# Supplementary material
Source: PubMed Central journal article supplement (PMC8976729)
Supplement: NIHMS1772431-supplement-10.pdf [file NIHMS1772431-supplement-10.pdf]

# Validation and Utility of ARDS Subphenotypes Identified by Machine Learning Models Using Clinical Data: An Observational Multi-Cohort Retrospective Analysis.

Manoj V. Maddali MD, Matthew Churpek PhD, Tai Pham PhD, Emanuele Rezoagli MD, Hanjing Zhuo MBBS, Wendi Zhao MHI, June He MBBS, Kevin L Delucchi PhD, Chunxue Wang PhD, Nancy Wickersham BS, J. Brennan McNeil BS, Alejandra Jauregui BS, Serena Ke BS, Kathryn Vessel BS, Antonio Gomez MD, Carolyn M. Hendrickson MD, Kirsten N. Kangelaris MD, Aartik Sarma MD, Aleksandra Leligdowicz PhD, Prof. Kathleen D. Liu PhD, Prof. Michael A Matthay MD, Prof. Lorraine B. Ware MD, Prof. John G. Laffey MD, Prof. Giacomo Bellani PhD, Prof. Carolyn S. Calfee MD, Pratik Sinha PhD, for the LUNG SAFE Investigators and the ESICM Trials Group

## Supplementary Material

### Table of Contents

|                                                      |    |
|------------------------------------------------------|----|
| Methods .....                                        | 1  |
| Study populations .....                              | 1  |
| Sensitivity analysis for treatment interaction ..... | 2  |
| Reference.....                                       | 2  |
| Supplementary tables .....                           | 3  |
| Table S1.....                                        | 3  |
| Table S2.....                                        | 4  |
| Table S3.....                                        | 5  |
| Table S4.....                                        | 6  |
| Table S5.....                                        | 7  |
| Table S6.....                                        | 8  |
| Table S7.....                                        | 9  |
| Table S8.....                                        | 10 |
| Table S9.....                                        | 11 |
| Table S10.....                                       | 12 |
| Table S11.....                                       | 13 |
| Table S12.....                                       | 14 |
| Table S13.....                                       | 15 |
| Table S14.....                                       | 16 |
| Table S15.....                                       | 17 |
| Table S16.....                                       | 18 |
| Supplementary Figure Legends.....                    | 19 |
| LUNG SAFE Investigators .....                        | 20 |

## Methods

### Study Populations

In the training cohort (ARMA, ALVEOLI, and FACTT) patient were assigned Latent class analysis (LCA) derived phenotype using pre-enrollment data. In EARLI and VALID, patients were followed until death, discharge, or at least 28 days. ARDS was diagnosed with consensus of two board-certified physicians who independently reviewed clinical data and radiographic studies. In EARLI, patients were enrolled into the study once a decision for ICU admission had been made by a physician in the emergency department. For most patients, data on day 1 of hospital admission constituted as study day 1 and this data was used to identify subphenotypes. By contrast, in VALID, patients were enrolled into the study on the morning of day two of ICU admission and consequently their hospital course and ICU may have been longer than the EARLI cohort.

In LUNG SAFE, patients were followed until death, discharge, or 90 days. ARDS was identified using the raw data of individual components of the Berlin Definition (i.e., low partial pressure of oxygen to inspired oxygen ratio, acute pulmonary infiltrates identified on radiographic imaging, and positive end expiratory pressure of at least 5cm H<sub>2</sub>O). Data was collected daily in the morning at 10 am. Bicarbonate in LUNG SAFE was derived from arterial blood gas sample, using the Henderson–Hasselbalch equation (whereas it was measured in the serum in EARLI and VALID). For the purposes of this study, the units of bilirubin and creatinine were converted from metric (mmol/L) to imperial (mg/dL).

In all cohorts, sample sizes were dictated by the convenience of data availability. In the validation cohort these were dictated by availability for LCA-derived phenotypes. Power analyses specifically for the presented modelling were not performed, however, all training, testing and validation cohorts were adequately powered for the original LCA studies.

### Details of XGBoost

XGBoost is an ensemble implementation of a gradient boosted machine, a type of supervised machine learning algorithm that is trained on a dataset with known labels and can then predict classifications in an evaluation set without known labels. Details of our machine learning approach have been previously published.<sup>1</sup> A decision tree is a simple mathematical algorithm that allows for classification based on a small number of parameters (e.g., is a single variable above a certain threshold?). XGBoost combines numerous decision trees for a final model (i.e., “ensemble”) that optimizes model accuracy in classifying the evaluation set. Each subsequent decision tree attempts to correct the error of the previous model (i.e., “gradient boost”) such that model accuracy is improved as additional trees are added.

In XGBoost, there are several components (“hyperparameters”) that must be tuned to optimize model performance. For example, an accurate model requires identifying the optimal number of trees, as adding many trees risks “over-fitting” the model to the training set with worsened performance in an evaluation set. We tuned the models to optimize the number of trees in the ensemble (*nrounds*), the depth of branches and complexity in each tree (*max\_depth*), and the “learning rate” at which the model corrects error in each subsequent step (*eta*). We utilized a grid search using the R package *caret* to identify optimal cutoffs. For *nrounds*, we searched the optimal number of trees between 50 and 1000 trees; for *max\_depth*, we searched for optimal tree depth between 2 and 5; and for *eta*, we searched for an optimal learning rate between 0.025 and 0.3 (see below table for final hyperparameters used). Other model hyperparameters were set at their default setting. The gain in classification accuracy associated with each variable across the numerous trees in the XGBoost model was aggregated to calculate a variable’s ranking as the most important.

| Model                           | nrounds | max_depth | eta   |
|---------------------------------|---------|-----------|-------|
| Vitals and labs                 | 550     | 2         | 0.025 |
| Full features                   | 800     | 3         | 0.025 |
| Custom LUNG SAFE variables only | 250     | 3         | 0.05  |

Another advantage of XGBoost is its in-built (sparsity-aware) algorithm to handle missing values. On the assumption that the values are missing at random, XGBoost models have a unified method of dealing with missing data. When constructing individual decision trees in the event of missing data, at each node, the default direction for missing data is selected based on learning from the data such that algorithm will select the direction with the highest gain to maximize model performance. We chose this approach, as opposed to imputation, because the models can generate probabilities despite missing data and would be a desirable feature in the prospective clinical setting.

### ***Sensitivity analysis for treatment interaction***

Several sensitivity analyses were performed to evaluate the heterogeneity of treatment effect that was observed in the PEEP-strategy groups and ARDS subphenotypes. First, PEEP groups were created using quintiles, such that the lower two quintiles served as the low-PEEP group and upper two quintiles served as high-PEEP group with the middle quintile discarded for analysis. Results of these analyses are presented in **Table S13**. Logistic regression model was created with the interaction term of PEEP-group and subphenotype serving as an independent variable and 90-day mortality as the dependent variable. Further treatment interaction was sought in subphenotypes classified using a range of probability cut-offs.

Further, sensitivity analyses were performed to evaluate whether heterogeneity of treatment effect was observed in PEEP groups with other markers of disease severity. For these analyses, we used PaO<sub>2</sub>/FiO<sub>2</sub> ratio and SOFA score and PEEP groups were derived using tertile values of the mean PEEP over day 1 to 3, as described in the primary analysis. Treatment interactions were sought using the approach outlined above. PaO<sub>2</sub>/FiO<sub>2</sub> ratio stratified groups were created using the severity stratification groups described in the Berlin definition (mild 200 to ≤300, moderate >100 to <200, and severe ≤100). The results of this analysis are presented in **Table S15**. For creating two SOFA subgroups, we used the following strategies: a) equal-sized groups were created using the median SOFA score; and b) based on SOFA score the population was split into proportions similar to the ARDS subphenotypes (75:25) with the smaller sized group having the higher SOFA score. The results of these analyses are presented in **Table S16**.

### **Reference**

1. Sinha P, Churpek MM, Calfee CS. Machine Learning Classifier Models Can Identify Acute Respiratory Distress Syndrome Phenotypes Using Readily Available Clinical Data. *Am J Respir Crit Care Med* 2020; **202**(7): 996-1004.

## Supplementary Tables

| Model                                                                                                                                                                                                                                           | Feature Set (Variables)                                                                                                                                                                                                                                                                                                                                                                                                                                                                                                                                                                               |
|-------------------------------------------------------------------------------------------------------------------------------------------------------------------------------------------------------------------------------------------------|-------------------------------------------------------------------------------------------------------------------------------------------------------------------------------------------------------------------------------------------------------------------------------------------------------------------------------------------------------------------------------------------------------------------------------------------------------------------------------------------------------------------------------------------------------------------------------------------------------|
| Vital signs and laboratory (Primary Model)<br>(“vitals and labs” model)<br><u>Training set:</u><br>- ARMA, ALVEOLI, FACTT (n=2022)<br><u>Independent Validation sets:</u><br>- EARLI (n=335)<br>- VALID (n=452)<br>- EARLI, EHR-derived (n=117) | Temperature (C; high), Systolic BP (mmHg; low), Heart Rate (bpm; high), Respiratory Rate (breaths/min; high), Vasopressor use (yes/no), Hematocrit (%; low), WBC Count ( $10^3/\mu\text{L}$ ; high), Platelet Count ( $10^3/\mu\text{L}$ ; low), Sodium (mmol/L; high), Creatinine (mg/dL; high), Bicarbonate (mmol/L; low), Albumin (g/dL; low), Bilirubin (mg/dL; high)                                                                                                                                                                                                                             |
| All available features (Secondary Model)<br>(“full featured” Model)<br><u>Training set:</u><br>- ARMA, ALVEOLI, FACTT (n=2022)<br><u>Validation sets:</u><br>- EARLI (n=335)<br>- VALID (n=452)<br>-                                            | Age (years), Sex (Female), Ethnicity (White), Risk factor for ARDS (i.e., pneumonia, sepsis, aspiration, trauma, or other), Temperature (C; high), Systolic BP (mmHg; low), Heart Rate (bpm; high), Respiratory Rate (breaths/min; high), Vasopressor use (yes/no), PEEP (cmH <sub>2</sub> O), PaCO <sub>2</sub> (mmHg), PaO <sub>2</sub> /FiO <sub>2</sub> (mmHg), Hematocrit (%; low), WBC Count ( $10^3/\mu\text{L}$ ; high), Platelet Count ( $10^3/\mu\text{L}$ ; low), Sodium (mmol/L; high), Creatinine (mg/dL; high), Bicarbonate (mmol/L; low), Albumin (g/dL; low), Bilirubin (mg/dL; high) |
| Features for LUNG SAFE model<br><u>Training set:</u><br>- ARMA, ALVEOLI, FACTT (n=2022)<br><u>Evaluation sets:</u><br>- SAILS (n=745)<br>- VALID (n=452)<br>- LUNG SAFE (n=2813)                                                                | Respiratory Rate (breaths/min), Mean Arterial Pressure (mmHg), Vasopressor Use (yes/no), Platelet Count ( $10^3/\mu\text{L}$ ), Creatinine (mg/dL), Bicarbonate (mmol/L), Bilirubin (mg/dL)                                                                                                                                                                                                                                                                                                                                                                                                           |

**Table S1 Description of model characteristics.** Features, training (derivation) cohort, and validation or evaluation cohorts used in the analyses. Abbreviations: Acute Respiratory Distress Syndrome (ARDS); Blood Pressure (BP); Positive End Expiratory Pressure (PEEP); Partial pressure of carbon dioxide in arterial blood (PaCO<sub>2</sub>); Ratio of partial pressure of oxygen in arterial blood to fraction inspired oxygen (PaO<sub>2</sub>/FiO<sub>2</sub>); White Blood Cell (WBC); Electronic Health Record (EHR).

| Characteristic                     | EARLI (n = 335) | VALID (n=452) | LUNG SAFE (n=2813) |
|------------------------------------|-----------------|---------------|--------------------|
| Age                                | 0 (0%)          | 0 (0%)        | 0 (0%)             |
| Female                             | 4 (1%)          | 0 (0%)        | 0 (0%)             |
| Ethnicity                          | 0 (0%)          | 0 (0%)        | *                  |
| Body Mass Index                    | 36 (11%)        | *             | 147 (5%)           |
| Temperature                        | 0 (0%)          | 2 (0%)        | *                  |
| Systolic BP                        | 2 (1%)          | 0 (0%)        | *                  |
| Mean Arterial Pressure             | *               | 0 (0%)        | 224 (8%)           |
| Heart Rate                         | 0 (0%)          | 0 (0%)        | *                  |
| Respiratory Rate                   | 4 (1%)          | 1 (0%)        | 12 (0%)            |
| Vasopressor Use                    | 1 (0%)          | 0 (0%)        | 16 (1%)            |
| Tidal Volume                       | *               | 125 (28%)     | 171 (6%)           |
| PEEP                               | 114 (34%)       | 141 (31%)     | 0 (0%)             |
| Minute Ventilation                 | 193 (58%)       | *             | 178 (6%)           |
| PaCO <sub>2</sub>                  | 46 (14%)        | 121 (27%)     | 31 (1%)            |
| PaO <sub>2</sub> /FiO <sub>2</sub> | 56 (17%)        | 125 (28%)     | 0 (0%)             |
| Hematocrit                         | 1 (0%)          | 2 (0%)        | *                  |
| WBC Count                          | 2 (1%)          | 3 (1%)        | *                  |
| Platelet Count                     | 1 (0%)          | 3 (1%)        | 126 (4%)           |
| Sodium                             | 1 (0%)          | 0 (0%)        | *                  |
| Creatinine                         | 2 (1%)          | 2 (0%)        | 202 (7%)           |
| Bicarbonate                        | 3 (1%)          | 0 (0%)        | 32 (1%)            |
| Glucose                            | 1 (0%)          | *             | *                  |
| Albumin                            | 114 (34%)       | 219 (48%)     | *                  |
| Bilirubin                          | 26 (8%)         | 124 (27%)     | 674 (24%)          |

**Table S2** Missing data for predictor variables. Values are presented as count and percentage. Abbreviations: Blood Pressure (BP), Positive End Expiratory Pressure (PEEP); Partial pressure of carbon dioxide in arterial blood (PaCO<sub>2</sub>); Ratio of partial pressure of oxygen in arterial blood to fraction inspired oxygen (PaO<sub>2</sub>/FiO<sub>2</sub>); White Blood Cell (WBC); \* Indicates predictor that was not available in the dataset.

| Characteristic                            | Training (n=2022) | EARLI (n=335)       | VALID (n=452)      | LUNG SAFE (n=2813) |
|-------------------------------------------|-------------------|---------------------|--------------------|--------------------|
| Number of patients                        | 2022              | 335                 | 452                | 2813               |
| Age (years)                               | 50 (± 17)         | 66 (± 17)           | 55 (± 16)          | 61 (±17)           |
| Sex (% female)                            | 901 (45%)         | 147 (44%)           | 214 (47%)          | 1084 (39%)         |
| Ethnicity (% White)                       | 1409 (70%)        | 165 (49%)           | 401 (89%)          | *                  |
| Body Mass Index (kg/m <sup>2</sup> )      | 27.9 (± 7.3)      | 27.1 (± 9.8)        | *                  | 27.5 (± 8.7)       |
| Temperature (C)                           | 38.4 (± 1.0)      | 37.7 (± 1.4)        | 37.9 (± 1.0)       | *                  |
| Systolic BP (mmHg)                        | 88 (± 17)         | 86 (± 21)           | 87 (± 16)          | *                  |
| Mean Arterial Pressure (mmHg)             | 69 (± 16)         | *                   | 96 (± 17)          | 74 (± 16)          |
| Heart Rate (bpm)                          | 125 (± 22)        | 126 (± 27)          | 121 (± 21)         | *                  |
| Respiratory Rate (breaths/min)            | 32 (26 – 40)      | 35 (30 – 40)        | 31 (26 – 37)       | 20 (16 – 26)       |
| Vasopressor use (%)                       | 647 (32%)         | 212 (63%)           | 199 (44%)          | 1420 (50%)         |
| Tidal Volume (mL)                         | 518 ± 139         | *                   | 426 (± 76)         | 476 (± 123)        |
| PEEP (cmH <sub>2</sub> O)                 | 10 (5 – 12)       | 5 (5 – 8)           | 10 (8 – 12)        | 8 (5 – 10)         |
| Minute Ventilation (L/min)                | 12.5 (± 4)        | 10.4 (± 3.3)        | *                  | 10.1 (± 3.9)       |
| PaCO <sub>2</sub> (mmHg)                  | 39 (± 10)         | 43 (± 16)           | 47 (± 14)          | 46 (± 16)          |
| PaO <sub>2</sub> /FiO <sub>2</sub> (mmHg) | 131 (± 61)        | 138 (± 68)          | 132 (± 66)         | 160 (± 67)         |
| Hematocrit (%)                            | 30 (± 6)          | 30 (± 7)            | 30 (± 7)           | *                  |
| WBC Count (10 <sup>3</sup> /mL)           | 14.7 (± 11.9)     | 15.0 (± 12.6)       | 15.4 (± 11.7)      | *                  |
| Platelet Count (10 <sup>3</sup> /mL)      | 183 (± 125)       | 169 (± 105)         | 181 (± 123)        | 178 (± 131)        |
| Sodium (mEq/dL)                           | 137 (± 6)         | 135 (± 6)           | 138 (± 6)          | *                  |
| Creatinine (mg/dL)                        | 1.5 (± 1.4)       | 2.1 (± 2.2)         | 2.0 (± 1.7)        | 1.7 (± 3.1)        |
| Bicarbonate (mmol/L)                      | 21.4 (± 5.5)      | 20.5 (± 5.9)        | 21.6 (± 5.1)       | 23.5 (± 6.8)       |
| Glucose (mg/dL)                           | 129 (± 60)        | 121 (± 66)          | *                  | *                  |
| Albumin (g/dL)                            | 2.2 (± 0.6)       | 2.5 (± 0.7)         | 2.6 (± 0.6)        | *                  |
| Bilirubin (mg/dL)                         | 0.8 (0.5 – 1.7)   | 1.0 (0.7 – 1.5)     | 1.1 (0.7 – 2.2)    | 0.8 (0.4 – 1.3)    |
| ARDS Risk factor: Trauma                  | 178 (9%)          | 0 (0%)              | 0 (0%)             | 87 (3%)            |
| ARDS Risk factor: Sepsis                  | 478 (24%)         | 118 (35%)           | 148 (33%)          | 455 (16%)          |
| ARDS Risk factor: Aspiration              | 305 (15%)         | 51 (15%)            | 108 (24%)          | 218 (8%)           |
| ARDS Risk factor: Pneumonia               | 837 (41%)         | 145 (43%)           | 156 (35%)          | 1540 (55%)         |
| ARDS Risk factor: Other                   | 224 (11%)         | 21 (6%)             | 40 (9%)            | 513 (18%)          |
| Interleukin-6 (pg/mL)                     | *                 | 191 (51 – 2471)     | 56 (20 – 260)      | *                  |
| Interleukin-8 (pg/mL)                     | *                 | 32 (12 – 208)       | 19 (8 – 72)        | *                  |
| Soluble TNF Receptor-1 (pg/mL)            | *                 | 4332 (2226 – 10089) | 3014 (1819 – 5030) | *                  |
| Protein C (% Control)                     | *                 | 90 (± 68)           | 62 (± 38)          | *                  |
| Ventilator Free Days                      | 17 (0 – 23)       | 21 (0 – 26)         | 18 (1 – 24)        | 10 (0 – 22)        |
| Mortality†                                | 575 (28%)         | 137 (41%)           | 151 (33%)          | 1108 (39%)         |

**Table S3** Baseline patient characteristics for training (combined cohort of ARMA, ALVEOLI, FACTT) and three observational cohorts, EARLI, VALID, and LUNG SAFE. Data are presented as count (%), mean (± standard deviation), or as median (interquartile range). †In ARMA, ALVEOLI, FACTT, and LUNG SAFE mortality is reported as 90-day mortality; in EARLI and VALID, mortality is reported as in-hospital mortality. Abbreviations: Blood Pressure (BP), Positive End Expiratory Pressure (PEEP); Partial pressure of carbon dioxide in arterial blood (PaCO<sub>2</sub>); Ratio of partial pressure of oxygen in arterial blood to fraction inspired oxygen (PaO<sub>2</sub>/FiO<sub>2</sub>); White Blood Cell (WBC); Acute Respiratory Distress Syndrome (ARDS); Chronic Obstructive Pulmonary Disease (COPD); Tumor Necrosis Factor (TNF). \* Indicates missing predictor in the cohort.

| <b>A: Vitals and labs model in EARLI</b> |          |             |             |                                |
|------------------------------------------|----------|-------------|-------------|--------------------------------|
| Probability Cutoff                       | Accuracy | Sensitivity | Specificity | Hyperinflammatory Subphenotype |
| 0.3                                      | 0.79     | 0.92        | 0.72        | 52% (173/335)                  |
| 0.4                                      | 0.82     | 0.87        | 0.80        | 45% (151/335)                  |
| 0.5                                      | 0.84     | 0.85        | 0.84        | 41% (139/335)                  |
| 0.6                                      | 0.85     | 0.79        | 0.89        | 36% (122/335)                  |
| 0.7                                      | 0.86     | 0.73        | 0.93        | 31% (104/335)                  |
| <b>B: Vitals and labs model in VALID</b> |          |             |             |                                |
| Probability Cutoff                       | Accuracy | Sensitivity | Specificity | Hyperinflammatory Subphenotype |
| 0.3                                      | 0.78     | 0.82        | 0.77        | 41% (187/452)                  |
| 0.4                                      | 0.79     | 0.72        | 0.83        | 34% (153/452)                  |
| 0.5                                      | 0.80     | 0.66        | 0.86        | 30% (134/452)                  |
| 0.6                                      | 0.82     | 0.62        | 0.91        | 25% (113/452)                  |
| 0.7                                      | 0.82     | 0.53        | 0.94        | 20% (91/452)                   |
| <b>C: Full featured model in EARLI</b>   |          |             |             |                                |
| Probability Cutoff                       | Accuracy | Sensitivity | Specificity | Hyperinflammatory Subphenotype |
| 0.3                                      | 0.84     | 0.88        | 0.81        | 44% (149/335)                  |
| 0.4                                      | 0.84     | 0.83        | 0.85        | 40% (135/335)                  |
| 0.5                                      | 0.85     | 0.80        | 0.88        | 37% (124/335)                  |
| 0.6                                      | 0.85     | 0.74        | 0.91        | 33% (110/335)                  |
| 0.7                                      | 0.83     | 0.67        | 0.93        | 29% (98/335)                   |
| <b>D: Full featured model in VALID</b>   |          |             |             |                                |
| Probability Cutoff                       | Accuracy | Sensitivity | Specificity | Hyperinflammatory Subphenotype |
| 0.3                                      | 0.78     | 0.71        | 0.81        | 35% (156/452)                  |
| 0.4                                      | 0.80     | 0.67        | 0.86        | 30% (137/452)                  |
| 0.5                                      | 0.81     | 0.64        | 0.89        | 27% (123/452)                  |
| 0.6                                      | 0.82     | 0.59        | 0.91        | 24% (108/452)                  |
| 0.7                                      | 0.81     | 0.51        | 0.94        | 20% (89/452)                   |

**Table S4. Model performance metrics for clinical-classifier model over a range of probability cutoffs for class assignment. A:** “Vitals and labs” model in EARLI (n=335). **B:** “Vitals and labs” model in VALID (n=452). **C:** “Full featured” model in EARLI (n=335). **D:** “full featured” model in VALID (n=452).

| <b>A: Vital signs and labs model in EARLI</b> |                |                         |                          |                    |                |
|-----------------------------------------------|----------------|-------------------------|--------------------------|--------------------|----------------|
| <b>Probability Cutoff</b>                     | <b>Outcome</b> | <b>Hypoinflammatory</b> | <b>Hyperinflammatory</b> | <b>Effect size</b> | <b>P value</b> |
| 0.3                                           | Mortality      | 30% (48/162)            | 51% (89/173)             | 2.5 (1.6 – 4.0)    | <0.0001        |
|                                               | VFD            | 25 (0 – 28)             | 7 (0 – 25)               | 0.26 (0.15 – 0.38) | <0.0001        |
| 0.4                                           | Mortality      | 28% (52/184)            | 56% (85/151)             | 3.3 (2.1 – 5.2)    | <0.0001        |
|                                               | VFD            | 24 (0 – 28)             | 0 (0 – 25)               | 0.30 (0.19 – 0.41) | <0.0001        |
| 0.6                                           | Mortality      | 30% (63/213)            | 61% (74/122)             | 3.7 (2.3 – 5.9)    | <0.0001        |
|                                               | VFD            | 24 (0 – 28)             | 0 (0 – 24)               | 0.31 (0.19 – 0.42) | <0.0001        |
| 0.7                                           | Mortality      | 30% (69/231)            | 65% (68/104)             | 4.4 (2.7 – 7.3)    | <0.0001        |
|                                               | VFD            | 24 (0 – 28)             | 0 (0 – 23)               | 0.33 (0.21 – 0.45) | <0.0001        |
| <b>B: Vital signs and labs model in VALID</b> |                |                         |                          |                    |                |
| <b>Probability Cutoff</b>                     | <b>Outcome</b> | <b>Hypoinflammatory</b> | <b>Hyperinflammatory</b> | <b>Effect size</b> | <b>P value</b> |
| 0.3                                           | Mortality      | 23% (61/265)            | 48% (90/187)             | 3.1 (2.1 – 4.7)    | <0.0001        |
|                                               | VFD            | 21 (8 – 25)             | 7 (0 – 22)               | 0.31 (0.21 – 0.4)  | <0.0001        |
| 0.4                                           | Mortality      | 24% (72/299)            | 52% (79/153)             | 3.4 (2.2 – 5.1)    | <0.0001        |
|                                               | VFD            | 21 (8 – 25)             | 4 (0 – 21)               | 0.36 (0.26 – 0.45) | <0.0001        |
| 0.6                                           | Mortality      | 27% (93/339)            | 51% (58/113)             | 2.8 (1.8 – 4.3)    | <0.0001        |
|                                               | VFD            | 20 (5 – 25)             | 4 (0 – 21)               | 0.32 (0.20 – 0.42) | <0.0001        |
| 0.7                                           | Mortality      | 28% (102/361)           | 54% (49/91)              | 3.0 (1.8 – 4.8)    | <0.0001        |
|                                               | VFD            | 20 (4 – 25)             | 2 (0 – 21)               | 0.36 (0.24 – 0.47) | <0.0001        |

**Table S5 Clinical outcomes for the ARDS subphenotypes classified using the Primary (“Vitals and labs”) model over a range of probability cutoffs for subphenotype assignment.** Outcomes are in-hospital mortality and Ventilator free days censored at day 28 (VFD; median and interquartile range). A: EARLI (n=335). B: VALID (n=452). Effect size was estimated using odds ratio for mortality and rank biserial correlation for VFD, with 95% confidence intervals. P-values are Chi-squared test for mortality and Wilcoxon-rank test for VFD.

| <b>A: Full featured model in EARLI</b> |                |                         |                          |                    |                |
|----------------------------------------|----------------|-------------------------|--------------------------|--------------------|----------------|
| <b>Probability Cutoff</b>              | <b>Outcome</b> | <b>Hypoinflammatory</b> | <b>Hyperinflammatory</b> | <b>Effect size</b> | <b>P value</b> |
| 0.3                                    | Mortality      | 27% (51/186)            | 58% (86/149)             | 3.6 (2.3 – 5.7)    | <0.0001        |
|                                        | VFD            | 25 (1 – 28)             | 0 (0 – 24)               | 0.33 (0.22 – 0.44) | <0.0001        |
| 0.4                                    | Mortality      | 28% (55/200)            | 61% (82/135)             | 4.1 (2.6 – 6.5)    | <0.0001        |
|                                        | VFD            | 24 (1 – 28)             | 0 (0 – 24)               | 0.35 (0.24 – 0.46) | <0.0001        |
| 0.5                                    | Mortality      | 28% (60/211)            | 62% (77/124)             | 4.1 (2.6 – 6.6)    | <0.0001        |
|                                        | VFD            | 24 (0 – 28)             | 0 (0 – 23)               | 0.35 (0.24 – 0.46) | <0.0001        |
| 0.6                                    | Mortality      | 29% (66/225)            | 65% (71/110)             | 4.4 (2.7 – 7.1)    | <0.0001        |
|                                        | VFD            | 24 (0 – 28)             | 0 (0 – 22)               | 0.37 (0.26 – 0.48) | <0.0001        |
| 0.7                                    | Mortality      | 30% (71/237)            | 67% (66/98)              | 4.8 (2.9 – 8.0)    | <0.0001        |
|                                        | VFD            | 24 (0 – 28)             | 0 (0 – 21)               | 0.37 (0.25 – 0.48) | <0.0001        |
| <b>B: Full featured model in VALID</b> |                |                         |                          |                    |                |
| <b>Probability Cutoff</b>              | <b>Outcome</b> | <b>Hypoinflammatory</b> | <b>Hyperinflammatory</b> | <b>Effect size</b> | <b>P value</b> |
| 0.3                                    | Mortality      | 25% (74/296)            | 49% (77/156)             | 2.9 (1.9 – 4.4)    | <0.0001        |
|                                        | VFD            | 21 (6 – 25)             | 7 (0 – 22)               | 0.28 (0.18 – 0.38) | <0.0001        |
| 0.4                                    | Mortality      | 26% (82/315)            | 50% (69/137)             | 2.9 (1.9 – 4.4)    | <0.0001        |
|                                        | VFD            | 21 (6 – 25)             | 5 (0 – 22)               | 0.3 (0.19 – 0.4)   | <0.0001        |
| 0.5                                    | Mortality      | 27% (88/329)            | 51% (63/123)             | 2.9 (1.9 – 4.4)    | <0.0001        |
|                                        | VFD            | 21 (5 – 25)             | 4 (0 – 21)               | 0.33 (0.22 – 0.43) | <0.0001        |
| 0.6                                    | Mortality      | 27% (94/344)            | 53% (57/108)             | 3.0 (1.9 – 4.6)    | <0.0001        |
|                                        | VFD            | 21 (5 – 25)             | 4 (0 – 21)               | 0.35 (0.23 – 0.45) | <0.0001        |
| 0.7                                    | Mortality      | 29% (104/363)           | 53% (47/89)              | 2.8 (1.7 – 4.5)    | <0.0001        |
|                                        | VFD            | 20 (4 – 25)             | 4 (0 – 21)               | 0.33 (0.21 – 0.45) | <0.0001        |

**Table S6. Clinical outcomes for the ARDS subphenotypes classified using the Secondary (“Full featured”) model over a range of probability cutoffs for subphenotype assignment.** Outcomes are in-hospital mortality and Ventilator free days censored at day 28 (VFD; median and interquartile range). A: EARLI (n=335). B: VALID (n=452). Effect size represents odds ratio for mortality and rank biserial correlation for VFD, with 95% confidence interval. P-values are Chi-squared test for mortality and Wilcoxon-rank test for VFD.

|                                         | <b>EARLI, EHR-derived (n=117)</b> | <b>Missing Data</b> |
|-----------------------------------------|-----------------------------------|---------------------|
| Number of patients                      | 117                               | N/A                 |
| Age (years)                             | 70 ( $\pm$ 15)                    | N/A                 |
| Sex (% female)                          | 47 (40%)                          | N/A                 |
| Ethnicity (% White)                     | 60 (51%)                          | N/A                 |
| Temperature (C)                         | 37.5 ( $\pm$ 1.3)                 | 1 (1%)              |
| Systolic BP (mmHg)                      | 78 ( $\pm$ 18)                    | 0 (0%)              |
| Heart Rate (bpm)                        | 124 ( $\pm$ 27)                   | 0 (0%)              |
| Respiratory Rate (breaths/min)          | 37 (33 – 42)                      | 0 (0%)              |
| Vasopressor use (%)                     | 82 (70%)                          | 0 (0%)              |
| Hematocrit (%)                          | 30 ( $\pm$ 7)                     | 5 (4%)              |
| WBC Count ( $10^3$ /mL)                 | 16.0 ( $\pm$ 10.7)                | 5 (4%)              |
| Platelet Count ( $10^3$ /mL)            | 181 ( $\pm$ 113)                  | 5 (4%)              |
| Sodium (mEq/dL)                         | 138 ( $\pm$ 6)                    | 0 (0%)              |
| Creatinine (mg/dL)                      | 2.2 ( $\pm$ 2.0)                  | 1 (1%)              |
| Bicarbonate (mmol/L)                    | 19.6 ( $\pm$ 5.9)                 | 1 (1%)              |
| Glucose (mg/dL)                         | 252 ( $\pm$ 121)                  | 0 (0%)              |
| Albumin (g/dL)                          | 2.3 ( $\pm$ 0.8)                  | 56 (48%)            |
| Bilirubin (mg/dL)                       | 1.1 (0.7 – 1.8)                   | 7 (6%)              |
| Hyperinflammatory Subphenotype (by LCA) | 48 (41%)                          | N/A                 |
| Ventilator Free Days                    | 10 (0 – 25)                       | N/A                 |
| In-hospital mortality                   | 56 (48%)                          | N/A                 |

**Table S7 Baseline patient characteristics for Electronic Health Record (EHR)-derived EARLI cohort and missing data per variable.** Missing data are specific to the data for this cohort that was derived from EPIC EHR. Data are presented as count (%), mean ( $\pm$  standard deviation) or as median (interquartile range). Abbreviations: Blood Pressure (BP); White Blood Cell (WBC); Latent Class Analysis (LCA). N/A = Not applicable as these parameters were obtained from the original EARLI cohort database and not from the EHR.

| Validation Cohort           | Outcome   | Hypoinflammatory | Hyperinflammatory | P value |
|-----------------------------|-----------|------------------|-------------------|---------|
| EARLI, EHR-derived<br>n=117 | Mortality | 33% (21/64)      | 66% (35/53)       | 0.0007  |
|                             | VFD       | 24 (0 – 26)      | 0 (0 – 21)        | 0.0005  |

**Table S8 Clinical outcomes for Electronic Health Record (EHR)-derived observational cohort (n=117) stratified by subphenotypes.** ARDS subphenotypes were classified by the “vital and labs” model using a probability cutoff of 0.5. Outcomes are in-hospital mortality and Ventilator free days censored at day 28 (VFD; median and interquartile range). P-values are Chi-squared test for mortality and Wilcoxon-rank test for VFD.

| Probability Cutoff | Accuracy | Sensitivity | Specificity | Youden Index | Hyperinflammatory Subphenotype |
|--------------------|----------|-------------|-------------|--------------|--------------------------------|
| 0.3                | 0.79     | 0.68        | 0.83        | 0.51         | 32% (146/452)                  |
| 0.4                | 0.81     | 0.64        | 0.89        | 0.53         | 27% (121/452)                  |
| 0.5                | 0.82     | 0.55        | 0.93        | 0.48         | 22% (98/452)                   |
| 0.6                | 0.82     | 0.51        | 0.96        | 0.47         | 18% (83/452)                   |
| 0.7                | 0.80     | 0.40        | 0.97        | 0.37         | 14% (64/452)                   |

**Table S9 Model performance metrics of the custom classifier (“LUNG SAFE”) model in VALID (n=452).**

Includes percentage of patients classified into the Hyperinflammatory subphenotype for each cut-off. The Youden index is defined as sensitivity + specificity – 1.

| Probability Cutoff | Outcome   | Hypoinflammatory | Hyperinflammatory | Effect size        | P value |
|--------------------|-----------|------------------|-------------------|--------------------|---------|
| 0·3                | Mortality | 32% (629/1951)   | 56% (479/862)     | 2·6 (2·2 – 3·1)    | <0·0001 |
|                    | VFD       | 15 (0 – 23)      | 0 (0 – 19)        | 0·23 (0·19 – 0·28) | <0·0001 |
| 0·5                | Mortality | 34% (753/2222)   | 60% (355/591)     | 2·9 (2·4 – 3·5)    | <0·0001 |
|                    | VFD       | 14 (0 – 23)      | 0 (0 – 18)        | 0·25 (0·20 – 0·30) | <0·0001 |
| 0·6                | Mortality | 35% (817/2338)   | 61% (291/475)     | 2·9 (2·4 – 3·6)    | <0·0001 |
|                    | VFD       | 13 (0 – 23)      | 0 (0 – 18)        | 0·24 (0·19 – 0·30) | <0·0001 |
| 0·7                | Mortality | 36% (864/2433)   | 64% (244/380)     | 3·2 (2·6 – 4·1)    | <0·0001 |
|                    | VFD       | 13 (0 – 23)      | 0 (0 – 17)        | 0·25 (0·19 – 0·31) | <0·0001 |

**Table S10 Clinical outcomes for ARDS subphenotypes in LUNG SAFE (n=2813) across a range of probability cutoffs for the “LUNG SAFE” model.** Mortality was assessed at day 90 and Ventilator free days (VFD) censored at day 28 (median and interquartile range). Effect size was estimated using odds ratio for mortality and rank biserial correlation for VFD, with 95% confidence intervals. P-values are Chi-squared test for mortality and Wilcoxon-rank test for VFD. Abbreviations: Acute Respiratory Distress Syndrome (ARDS).

| Clinical feature                                    | Hypoinflammatory | Hyperinflammatory | P value |
|-----------------------------------------------------|------------------|-------------------|---------|
| ARDS Diagnosis on Day 2                             | 65% (937/1447)   | 72% (340/469)     | 0·0024  |
| Prevalence of chronic liver disease                 | 2% (44/2088)     | 9% (68/725)       | <0·0001 |
| Prevalence of Chronic Obstructive Pulmonary Disease | 24% (500/2088)   | 15% (107/725)     | <0·0001 |
| Prevalence of immunosuppression                     | 12% (249/2088)   | 14% (104/725)     | 0·10    |

**Table S11 ARDS resolution and underlying disease prevalence in ARDS subphenotypes in LUNG SAFE (n=2813).** ARDS subphenotypes were classified by the LUNG SAFE model using a probability cutoff of 0·4 for subphenotype assignments. Abbreviations: Acute Respiratory Distress Syndrome (ARDS).

| Characteristic                                  | Hyperinflammatory Low PEEP subgroup | Hyperinflammatory High PEEP subgroup |
|-------------------------------------------------|-------------------------------------|--------------------------------------|
| Age (years)                                     | 66 ± 15                             | 59 ± 16                              |
| Female (% female)                               | 74 (36%)                            | 117 (37%)                            |
| Body Mass Index (kg/m <sup>2</sup> )            | 27.0 ± 6.3                          | 27.8 ± 7.0                           |
| PaO <sub>2</sub> /FiO <sub>2</sub> ratio (mmHg) | 186 ± 63                            | 135 ± 53                             |
| SOFA Score                                      | 13 (11 – 15)                        | 13 (11 – 15)                         |
| ARDS Risk factor: Trauma                        | 2 (1%)                              | 5 (2%)                               |
| ARDS Risk factor: Sepsis                        | 51 (25%)                            | 73 (23%)                             |
| ARDS Risk factor: Aspiration                    | 15 (7%)                             | 26 (8%)                              |
| ARDS Risk factor: Pneumonia                     | 87 (42%)                            | 165 (53%)                            |
| ARDS Risk factor: Other                         | 50 (24%)                            | 44 (14%)                             |

**Table S12 Comparison of baseline characteristics between the Hyperinflammatory low-PEEP (n=205) and high-PEEP (n=313) subgroups in LUNG SAFE.** ARDS subphenotypes were classified by the LUNG SAFE model using a probability cutoff of 0.4 for subphenotype assignments. PEEP subgroups were assigned based on tertiles of the mean PEEP usage over days 1-3, such that the upper tertile was the High PEEP group and lower tertile the Low PEEP group, with the middle tertile discarded. Data are presented as count (%), mean (± standard deviation), or median (interquartile range). Abbreviations: Positive end-expiratory pressure (PEEP); Sequential Organ Failure Assessment (SOFA); Acute Respiratory Distress Syndrome (ARDS).

| Probability Cutoff | Mortality in Hypoinflammatory subphenotype |               | Mortality in Hyperinflammatory subphenotype |               | P value |
|--------------------|--------------------------------------------|---------------|---------------------------------------------|---------------|---------|
|                    | Low PEEP                                   | High PEEP     | Low PEEP                                    | High PEEP     |         |
| 0·3                | 31% (214/699)                              | 34% (210/618) | 61% (146/240)                               | 51% (190/370) | 0·009   |
| 0·4                | 32% (233/734)                              | 34% (231/675) | 62% (127/205)                               | 54% (169/313) | 0·041   |
| 0·5                | 32% (247/764)                              | 35% (259/739) | 65% (113/175)                               | 57% (141/249) | 0·048   |
| 0·6                | 34% (267/794)                              | 36% (288/790) | 64% (93/145)                                | 57% (112/198) | 0·075   |
| 0·7                | 34% (282/825)                              | 37% (302/823) | 68% (78/114)                                | 59% (98/165)  | 0·069   |

**Table S13 Mortality at Day 90 in tertile-derived PEEP subgroups stratified by ARDS subphenotypes over a range of probability cutoff for subphenotype classification in LUNG SAFE (n = 2813).** ARDS subphenotypes were classified by the LUNG SAFE model. PEEP subgroups were assigned based on tertiles of the mean PEEP usage over days 1-3, such that the upper tertile was the High PEEP group (n=992; median 11 cm H<sub>2</sub>O [10 – 12]) and lower tertile the Low PEEP group (n=943; median 5 cm H<sub>2</sub>O [5 – 6]). Abbreviations: Positive End Expiratory Pressure (PEEP); Acute Respiratory Distress Syndrome (ARDS). P-value is for the interaction term of PEEP subgroups and ARDS subphenotypes with mortality as the dependent variable and was derived using the Wald test.

| Probability Cutoff | Mortality in Hypoinflammatory subphenotype |               | Mortality in Hyperinflammatory subphenotype |               | P value |
|--------------------|--------------------------------------------|---------------|---------------------------------------------|---------------|---------|
|                    | Low PEEP                                   | High PEEP     | Low PEEP                                    | High PEEP     |         |
| 0·3                | 31% (234/753)                              | 35% (244/701) | 61% (159/262)                               | 52% (206/399) | 0·006   |
| 0·4                | 32% (256/792)                              | 35% (267/763) | 61% (137/223)                               | 54% (183/337) | 0·045   |
| 0·5                | 33% (271/824)                              | 36% (298/830) | 64% (122/191)                               | 56% (152/270) | 0·041   |
| 0·6                | 34% (292/856)                              | 37% (331/887) | 64% (101/159)                               | 56% (119/213) | 0·053   |
| 0·7                | 35% (308/890)                              | 38% (348/924) | 68% (85/125)                                | 58% (102/176) | 0·032   |

**Table S14 Mortality at Day 90 in quintile-derived PEEP subgroups stratified by ARDS subphenotypes over a range of probability cutoff for subphenotype classification in LUNG SAFE (n = 2813).** ARDS subphenotypes were classified by the LUNG SAFE model. PEEP subgroups were assigned based on quintiles of the mean PEEP usage over days 1-3, such that the upper two quintiles were the High PEEP group (n=1104; median 10 cm H<sub>2</sub>O [9 – 12]) and the lower two quintiles were the Low PEEP group (n=1019; median 5 cm H<sub>2</sub>O [5 – 6]). P-value is for the interaction term of PEEP subgroups and ARDS subphenotypes with mortality as the dependent variable and was derived using the Wald test.

| ARDS Severity by PaO <sub>2</sub> /FiO <sub>2</sub>                 | Mortality in Low PEEP | Mortality in High PEEP | P value |
|---------------------------------------------------------------------|-----------------------|------------------------|---------|
| Mild (PaO <sub>2</sub> /FiO <sub>2</sub> 200 – 300)<br>n=828        | 35% (133/384)         | 34% (59/173)           | 0·96    |
| Moderate (PaO <sub>2</sub> /FiO <sub>2</sub> 100 – < 200)<br>n=1341 | 39% (172/441)         | 39% (174/449)          |         |
| Severe (PaO <sub>2</sub> /FiO <sub>2</sub> ≤ 100)<br>n=644          | 48% (55/114)          | 46% (167/366)          |         |

**Table S15. Mortality at Day 90 in tertile-derived PEEP subgroups stratified by ARDS severity defined by PaO<sub>2</sub>/FiO<sub>2</sub> in LUNG SAFE (n = 2813).** PEEP subgroups were assigned based on tertiles of the mean PEEP usage over days 1-3, such that the upper tertile was the High PEEP group (n=992; median 11 cm H<sub>2</sub>O [10 – 12]) and lower tertile the Low PEEP group (n=943; median 5 cm H<sub>2</sub>O [5 – 6]). Abbreviations: Positive End Expiratory Pressure (PEEP); Acute Respiratory Distress Syndrome (ARDS). P-value is for the interaction term of PEEP subgroups and ARDS severity groups with mortality as the dependent variable and was derived using the Wald test.

| <b>A: SOFA subgroups based on mean SOFA score</b>                                      |                              |                               |                |
|----------------------------------------------------------------------------------------|------------------------------|-------------------------------|----------------|
| <b>ARDS Severity by SOFA score</b>                                                     | <b>Mortality in Low PEEP</b> | <b>Mortality in High PEEP</b> | <b>P value</b> |
| Low SOFA ( $\leq 10$ )<br>n=1314                                                       | 30% (139/457)                | 30% (132/441)                 | 0.51           |
| High SOFA ( $> 10$ )<br>n=1063                                                         | 54% (165/308)                | 50% (230/464)                 |                |
| <b>B: SOFA subgroups split into proportions similar to ARDS subphenotypes (~75:25)</b> |                              |                               |                |
| <b>ARDS Severity by SOFA score</b>                                                     | <b>Mortality in Low PEEP</b> | <b>Mortality in High PEEP</b> | <b>P value</b> |
| Low SOFA ( $\leq 13$ )<br>n=1857                                                       | 34% (209/614)                | 34% (232/677)                 | 0.30           |
| High SOFA ( $> 13$ )<br>n=520                                                          | 63% (95/151)                 | 57% (130/228)                 |                |

**Table S16. Mortality at Day 90 in tertile-derived PEEP subgroups stratified by Sequential Organ Failure Assessment (SOFA) score subgroups in LUNG SAFE (n = 2813).** PEEP subgroups were assigned based on tertiles of the mean PEEP usage over days 1-3, such that the upper tertile was the High PEEP group (n=992; median 11 cm H<sub>2</sub>O [10 – 12]) and lower tertile the Low PEEP group (n=943; median 5 cm H<sub>2</sub>O [5 – 6]). A: Two SOFA subgroups derived by splitting at the median value. B: Two SOFA subgroups derived to achieve proportions similar to ARDS subphenotypes (~75:25), with the smaller subgroup comprising the higher SOFA scores. Abbreviations: Sequential Organ Failure Assessment (SOFA); Acute Respiratory Distress Syndrome (ARDS); Positive End Expiratory Pressure (PEEP). P-value is for the interaction term of PEEP subgroups and SOFA subgroups with mortality as the dependent variable and was derived using the Wald test.

## Supplementary Figure Legends

**Figure S1 Feature importance of the ten most important features of the clinical-classifier models in the training data cohort (ARMA, ALVEOLI, and FACTT; n=2022).** **A:** Primary (“vital and labs”) model. **B:** Secondary (full-feature) model. Abbreviations: Blood Pressure (BP); White Blood Cell (WBC).

**Figure S2 Probabilities generated by the new clinical-classifier models developed for this study plotted against the probabilities generated by the corresponding models developed in our prior study.<sup>1</sup>** **A:** Primary (“vital and labs”) model. **B:** Secondary (“full feature”) model. R = represents Pearson’s correlation coefficient.

**Figure S3 Calibration plot for the primary (“vital and labs”) and secondary (“full featured”) models.** The model generated probabilities for Hyperinflammatory subphenotype with LCA-derived subphenotype as the gold-standard classification. **A:** EARLI (n=335). **B:** VALID (n=452). CI = 95% Confidence interval.

**Figure S4 Receiver operating characteristic (ROC) curve for secondary (“full-feature”) model in EARLI (n=335) and VALID (n=452).** AUC = Area under the ROC curve. EARLI AUC = 0.92; VALID AUC = 0.87

**Figure S5 Differences in protein biomarkers when patients are stratified by “full feature” model, for EARLI (n=335) and VALID (n=452) cohorts.** Y-axis was limited to aid better data visualization. Consequently, in EARLI, 9, 10, 13, and 4 observations were censored, and in VALID, 13, 16, 17, and 3 observations were censored for Interleukin-6, Interleukin-8, Soluble tumor necrosis factor receptor-1, and Protein C, respectively.

**Figure S6 Alluvial plot showing ARDS subphenotype assignments by LCA (left), hand-curated cohort (middle) and EHR-derived cohort (right).** All three cohorts were subsets of the EARLI cohort and comprised 117 patients. The “vitals and labs” clinical classifier model was used to assign subphenotype for both EHR cohorts. Abbreviations: Latent Class Analysis (LCA); Area Under Receiver Operating Characteristic Curve (AUC); Electronic Health Record (EHR); Hyperinflammatory subphenotype (Hyper); Hypoinflammatory subphenotype (Hypo).

## **LUNG SAFE INVESTIGATORS:**

### **LUNG SAFE National Coordinators:**

**Argentina:** Fernando Rios; **Australia/New Zealand:** Frank Van Haren; **Belgium:** Sottiaux T, Depuydt P; **Bolivia:** Fredy S Lora; **Brazil:** Luciano Cesar Azevedo; **Canada:** Eddy Fan; **Chile:** Guillermo Bugedo ; **China:** Haibo Qiu; **Colombia:** Marcos Gonzalez; **Costa Rica:** Juan Silesky; **Czech Republic:** Vladimir Cerny; **Denmark:** Jonas Nielsen; **Ecuador:** Manuel Jibaja; **France:** Tâi Pham; **Germany:** Hermann Wrigge; **Greece:** Dimitrios Matamis; **Guatemala:** Jorge Luis Ranero; **India:** Pravin Amin; **Iran:** S.M. Hashemian; **Ireland:** Kevin Clarkson; **Italy:** Giacomo Bellani; **Japan:** Kiyoyasu Kurahashi; **Mexico:** Asisclo Villagomez; **Morocco:** Amine Ali Zeggwagh; **Netherlands:** Leo M Heunks; **Norway:** Jon Henrik Laake ; **Philippines:** Jose Emmanuel Palo ; **Portugal:** Antero do Vale Fernandes; **Romania:** Dorel Sandesc; **Saudi Arabia:** Yaasen Arabi; **Serbia:** Vesna Bumbasierevic; **Spain:** Nicolas Nin, Jose A Lorente; **Sweden:** Anders Larsson; **Switzerland:** Lise Piquilloud; **Tunisia:** Fekri Abroug; **United Kingdom:** Daniel F McAuley, Lia McNamee; **Uruguay:** Javier Hurtado; **USA:** Ed Bajwa; **Venezuela:** Gabriel Démpaire;

### **National societies/Networks endorsing the LUNG SAFE study:**

ANZICS Clinical Trials Group, Réseau Européen de Recherche en Ventilation Artificielle (ReVA Network); Irish Critical Care Trials Group; Société de Réanimation de Langue Française (SRLF); Société Française d'Anesthésie et de Réanimation (SFAR); Società Italiana Anestesia, Analgesia, Rianimazione e Terapia Intensiva (SIAARTI); The Japanese Society of Intensive Care Medicine (JSICM); Nonprofit Organization Japanese Society of Education for Physicians and Trainees in Intensive Care (JSEPTIC); UK Intensive Care Society.

**LUNG SAFE Study Coordinator:** Guy M Francois (European Society of Intensive Care Medicine, Brussels, Belgium)

### **Site investigators by country:**

**ALBANIA:** Uhc Mother Theresa (Tirana): Hektor Sula, Lordian Nunci; University Hospital Shefqet Ndroqi (Tirana): Alma Cani;

**ARGENTINA:** Clinica De Especialidades (Villa Maria): Alan Zazu ; Hospital Dr Julio C. Perrando (Resistencia): Christian Dellera, Carolina S Insaurralde; Sanatorio Las Lomas (San Isidro, Buenos Aires): Risso V Alejandro; Sanatorio De La Trinidad San Isidro (San Isidro): Julio Daldin, Mauricio Vinzio; Hospital Español De Mendoza (Godoy Cruz - Mendoza): Ruben O Fernandez; Hospital Del Centenario (Rosario): Luis P Cardonnet, Lisandro R Bettini; San Antonio (Gualeguay (Entre Rios)): Mariano Carboni Bisso, Emilio M Osman; Cemic (Buenos Aires): Mariano G Setten, Pablo Lovazzano; Hospital Universitarario Austral (Pilar): Javier Alvarez, Veronica Villar; Hospital Por + Salud (Pami) Dr. Cesar Milstein (Buenos Aires): Norberto C Pozo, Nicolas Grubissich; Sanatorio Anchorena (Buenos Aires): Gustavo A Plotnikow, Daniela N Vasquez; Sanatorio De La Trinidad Mitre (Buenos Aires): Santiago Ilutovich, Norberto Tiribelli; Hospital Luis Lagomaggiore (Mendoza): Ariel Chena, Carlos A Pellegrini; H.I.G.A San Martín (La Plata): María G Saenz, Elisa Estenssoro; Hospital Misericordia (Cordoba): Matias Brizuela, Hernan Gianinetto; Sanatorio Juncal (Temperley): Pablo E Gomez, Valeria I Cerrato; Hospital D. F. Santojanni (Buenos Aires): Marco G Bezzi, Silvina A Borello; Hospital Alejandro Posadas (Buenos Aires): Flavia A Loiacono, Adriana M Fernandez;

**AUSTRALIA:** St. Vincents Hospital, Sydney (Darlinghurst): Serena Knowles, Claire Reynolds; St George Public Hospital (Kogarah): Deborah M Inskip, Jennene J Miller; Westmead Hospital (Westmead): Jing Kong, Christina Whitehead; Flinders Medical Centre (Bedford Park, South Australia): Shailesh Bihari; John Hunter Hospital (Newcastle): Aylin Seven, Amanda Krstevski; Canberra Hospital (Garran): Helen J Rodgers, Rebecca T Millar; Calvary Mater Newcastle (Waratah): Toni E Mckenna, Irene M Bailey; Cabrini Hospital (Melbourne): Gabrielle C Hanlon; Liverpool Hospital (Liverpool): Anders Aneman, Joan M Lynch; Coffs Harbour Health Campus (Coffs Harbour): Raman Azad, John Neal; Sir Charles Gairdner Hospital (Nedlands): Paul W Woods, Brigit L Roberts; Concord Hospital (Concord): Mark R Kol, Helen S Wong;

**AUSTRIA:** General Hospital Of Vienna/Medical University Of Vienna (Vienna): Katharina C Riss, Thomas Staudinger;

**BELGIUM:** Cliniques universitaires St Luc, UCL (Brussels): Xavier Wittebole, Caroline Berghe; CHU Dinant-Godinne (Yvoir): Pierre A Bulpa, Alain M Dive; AZ Sint Augustinus Veurne (Veurne): Rik Verstraete, Herve Lebbinck; Ghent University Hospital (Ghent): Pieter Depuydt, Joris Vermassen;; University Hospitals Leuven (Leuven): Philippe, Meersseman, Helga Ceunen;

**BRAZIL:** Hospital Renascentista (Pouso Alegre): Jonas I Rosa, Daniel O Beraldo; Vitoria Apart Hospital (Serra): Claudio Piras, Adenilton M Rampinelli; Hospital Das Clinicas (São Paulo): Antonio P Nassar Jr; Hospital Geral Do Grajaú (São Paulo): Sergio Mataloun, Marcelo Mook; Evangelical Hospital (Cachoeiro De Itapemirim / Espírito Santo): Marlus M Thompson, Claudio H Gonçalves-; Hospital Moinhos De Vento (Porto Alegre): Ana Carolina P Antônio, Aline Ascoli; Hospital Alvorada Taguatinga (Taguatinga): Rodrigo S Biondi, Danielle C Fontenele; Complexo Hospitalar Mngabeira Tarcisio Burity (Joao Pessoa): Danielle Nobrega, Vanessa M Sales;

**BRUNEI DARUSSALAM:** Raja Isteri Pengiran Anak Saleha (Ripas) Hospital (Bandar Seri Begawan): Dr Suresh .Shindhe, Dr Dk Maizatul Aiman B Pg Hj Ismail;

**CANADA:** Medical-Surgical ICU of St Michael's Hospital (Toronto): John Laffey, Francois Beloncle; St. Josephs Health Centre (Toronto): Kyle G Davies, Rob Cirone; Sunnybrook Health Sciences Center (Toronto): Venika Manoharan, Mehvish Ismail; Toronto Western Hospital (Toronto): Ewan C Goligher, Mandeep Jassal; Medical Surgical ICU of the Toronto General Hospital (Toronto): Erin Nishikawa, Areej Javeed; Cardiovascular ICU of St Michael's Hospital (Toronto): Gerard Curley, Nuttapol Rittayamai ; Cardiovascular ICU of the Toronto General Hospital (Toronto): Matteo Parotto, Niall D Ferguson; Mount Sinai Hospital (Toronto): Sangeeta Mehta, Jenny Knoll ; Trauma-Neuro ICU of St Michael's Hospital (Toronto): Antoine Pronovost, Sergio Canestrini

**CHILE:** Hospital Clínico Pontificia Universidad Católica De Chile (Santiago): Alejandro R Bruhn, Patricio H Garcia; Hospital Militar De Santiago (Santiago): Felipe A Aliaga, Pamela A Fariás; Clinica Davila (Santiago): Jacob S Yumha; Hospital Guillermo Grant Benavente (Concepcion): Claudia A Ortiz, Javier E Salas; Clinica Las Lilas (Santiago): Alejandro A Saez, Luis D Vega; Hospital Naval Almirante Nef (Viña Del Mar): Eduardo F Labarca, Felipe T Martinez; Hospital Luis Tisné Brousse (Penanolen): Nicolás G Carreño, Pilar Lora;

**CHINA:** The Second Affiliated Hospital Of Harbin Medical University (Harbin): Haitao Liu; Nanjing Zhong-Da Hospital, Southeast University (Nanjing): Haibo Qiu, Ling Liu; The First Affiliated Hospital Of Anhui Medical University (Hefei): Rui / Tang, Xiaoming Luo; Peking University People's Hospital (Beijing): Youzhong An, Huiying Zhao; Fourth Affiliated Hospital Of Harbin Medical University (Harbin): Yan - Gao, Zhe - Zhai; Nanjing Jiangbei Peoples Hospital Affiliated To Medical School Of Southeast University (Nanjing): Zheng L Ye, Wei Wang; The First Affiliated Hospital Of Dalian Medical University (Dalian): Wenwen Li, Qingdong Li; Subei Peoples Hospital Of Jiangsu Province (Yangzhou): Ruiqiang Zheng ; Jinling Hospital (Nanjing): Wenkui Yu, Juanhong Shen; Urumqi General Hospital (Urumqi): Xinyu Li; Intensive Care Unit, First Affiliated Hospital Of Wannan Medical College, Yijishan Hospital, (Wuhu): Tao Yu, Weihua Lu; Sichuan Provincial Peoples Hospital (Chengdu): Ya Q Wu, Xiao B Huang; Hainan Province Peoples Hospital (Haikou): Zhenyang He; Peoples Hospital Of Jiangxi Province (Nanchang): Yuanhua Lu; Qilu Hospital Of Shandong University (Jinan): Hui Han, Fan Zhang; Zhejiang Provincial Peoples Hospital (Hangzhou): Renhua Sun ; The First Affiliated Hospital Of Bengbu Medical College (Bengbu, Anhui): Hua X Wang, Shu H Qin; Nanjing Municipal Government Hospital (Nanjing): Bao H Zhu, Jun Zhao; The First Hospital Of Lanzhou University (Lanzhou): Jian / Liu, Bin / Li; The First Affiliated Hospital Of Chongqing University Of Medical Science (Chongqing): Jing L Liu, Fa C Zhou; Xuzhou Central Hospital, Jiangsu Province, China (Xuzhou): Qiong J Li, Xing Y Zhang; The First Peoples Hospital Of Foshan (Foshan): Zhou Li-Xin, Qiang Xin-Hua; The First Affiliated Hospital Of Guangxi Medical University (Nanning): Liangyan Jiang; Renji Hospital ,Shanghai Jiao Tong University School Of Medicine (Shanghai): Yuan N Gao, Xian Y Zhao; First Hospital Of Shanxi Medical University (Taiyuan): Yuan Y Li, Xiao L Li; Shandong Provincial Hospital (Jinan): Chunting Wang, Qingchun Yao ; Fujian Provincial Hospital (Fuzhou): Rongguo Yu, Kai Chen; Henan Provincial People's Hospital (Zhengzhou): Huanzhang Shao, Bingyu Qin ; The Second Affiliated Hospital Of Kunming Medical University (Kunming City): Qing Q Huang, Wei H Zhu; Xiangya Hospital, Central South University (Changsha): Ai Y Hang, Ma X Hua; The First Affiliated Hospital Of Guangzhou Medical University (Guangzhou): Yimin Li, Yonghao Xu; Peoples Hospital of Hebei Province (Shijiazhuang): Yu D Di, Long L Ling; Guangdong General Hospital (Guangzhou): Tie H Qin, Shou H Wang; Beijing Tongren Hospital (Beijing): Junping Qin; Jiangsu Province Hospital (Nanjing): Yi Han, Suming Zhou; COLOMBIA: Fundación Valle Del Lili (Cali): Monica P Vargas;

**COSTA RICA:** Hospital San Juan De Dios (:): Juan I Silesky Jimenez, Manuel A González Rojas; Hospital San Juan De Dios (San José): Jaime E Solis-Quesada, Christian M Ramirez-Alfaro;

**CZECH REPUBLIC:** University Hospital Of Ostrava (Ostrava): Jan Máca, Peter Sklienka;

**DENMARK:** Aarhus Universitetshospital (Aarhus N): Jakob Gjedsted, Aage Christiansen; Rigshospitalet: Jonas Nielsen;

**ECUADOR:** Hospital Militar (Quito): Boris G Villamagua, Miguel Llano;

**FRANCE:** Clinique du Millenaire (Montpellier): Philippe Burtin, Gautier Buzancais; Centre Hospitalier (Roanne): Pascal Beuret, Nicolas Pelletier; CHU d'Angers (Angers): Satar Mortaza, Alain Mercat; Hôpital Marc Jacquet (Melun): Jonathan Chelly, Sébastien Jochmans; CHU Caen (Caen): Nicolas Terzi, Cédric Daubin; Henri Mondor Hospital (Créteil): Guillaume Carteaux, Nicolas de Prost; Cochin Hospital (Paris): Jean-Daniel Chiche, Fabrice

Daviaud ; Hôpital Tenon (Paris): Tai Pham, Muriel Fartoukh; CH Mulhouse-Emile Muller (Mulhouse): Guillaume Barberet, Jerome Biehler; Archet 1 University Hospital (Nice): Jean Dellamonica, Denis Doyen; Hopital Sainte Musse (Toulon): Jean-Michel Arnal, Anais Briquet; Hopital Nord - Réanimation des Détresses Respiratoires et Infections Sévères (Marseille): Sami Hraiech, Laurent Papazian; HEGP (Paris): Arnaud Follin; Louis Mourier Hospital (Colombes): Damien Roux, Jonathan Messika; Centre Hospitalier de Dax (Dax ): Evangelos Kalaitzis ; Réanimation Médicale, GH Pitié-Salpêtrière (Paris) : Laurence Dangers, Alain Combes; Ap-Hp Ambroise Paré (Boulogne-Billancourt): Siu-Ming Au; University Hospital Rouen (Rouen): Gaetan Béduneau, Dorothée Carpentier; CHU Amiens (Amiens - Salouel): Elie H Zogheib, Herve Dupont; Centre Hospitalier Intercommunal Robert Ballanger (Aulnay Sous Bois): Sylvie Ricome, Francesco L Santoli; Centre Hospitalier René Dubos (Pontoise): Sebastien L Besset; CHI Portes de l'Oise (Beaumont Sur Oise): Philippe Michel, Bruno Gelée; Archet 2 University Hospital (Nice): Pierre-Eric Danin, Bernard Goubaux; Centre Hospitalier Pierre Oudot (Bourgoin Jallieu): Philippe J Crova, Nga T Phan; CH Dunkerque (Dunkerque): Frantz Berkelmans ; Centre Hospitalier de Belfort Montbéliard (Belfort): Julio C Badie, Romain Taponnier; Centre Hospitalier Emile Muller (Mulhouse): Josette Gally, Samy Khebbeb; Hôpital de Haute-pierre-Hôpitaux Universitaires de Strasbourg (Strasbourg): Jean-Etienne Herbrecht, Francis Schneider; Centre Hospitalier de Dieppe (Dieppe): Pierre-Louis M Declercq, Jean-Philippe Rigaud; Bicetre (Le Kremlin-Bicetre): Jacques Duranteau, Anatole Harrois; CHU Gabriel Montpied (Clermont-Ferrand): Russell Chabanne, Julien Marin; CHU Estaing (Clermont-Ferrand): Charlene Bigot, Sandrine Thibault; CHI Eure-Seine Evreux (Evreux): Mohammed Ghazi, Messabi Boukhazna; Centre Hospitalier d Châlons en Champagne (Châlons en Champagne): Salem Ould Zein; CH Beauvais (Beauvais): Jack R Richecoeur, Daniele M Comboux; Centre Hospitalier Le Mans (Le Mans): Fabien Grelon, Charlene Le Moal; Hôpital Fleyriat (Bourg en Bresse): Elise P Sauvadet, Adrien Robine; Hôpital Saint Louis (Paris): Virginie Lemiale, Danielle Reuter; Service de Pneumologie Pitié-Salpêtrière (Paris): Martin Dres, Alexandre Demoule; Centre Hospitalier Gonesse (Gonesse): Dany Goldgran-Toledano; Hôpital Croix Rousse (Lyon): Loredana Baboi, Claude Guérin;

**GERMANY:** St. Nikolaus-Stiftshospital (Andernach): Ralph Lohner; Fachkrankenhaus Coswig GmbH (Coswig): Jens Kraßler, Susanne Schäfer; University Hospital Frankfurt (Frankfurt am Main): Kai D Zacharowski, Patrick Meybohm; Department of Anaesthesia & Intensive Care Medicine, University Hospital of Leipzig (Leipzig): Andreas W Reske, Philipp Simon; Asklepios Klinik Langen (Langen): Hans-Bernd F Hopf, Michael Schuetz; Städtisches Krankenhaus Heinsberg (Heinsberg): Thomas Baltus;

**GREECE:** Hippokrateion General Hospital Of Athens (Athens): Metaxia N Papanikolaou, Theonymfi G Papavasilopoulou; Gh Ahepa (Thessaloniki): Giannis A Zacharas, Vasilis Ourailogloy; Hippokration General Hospital of Thessaloniki (Thessaloniki): Eleni K Mouloudi, Eleni V Massa; Hospital General of Kavala (Kavala): Eva O Nagy, Electra E Stamou; Papageorgiou General Hospital (Thessaloniki): Ellada V Kiourtzieva, Marina A Oikonomou;

**GUATEMALA:** Hospital General De Enfermedades, Instituto Guatemalteco De Seguridad Social (Ciudad De Guatemala): Luis E Avila; Centro Médico Militar (Guatemala): Cesar A Cortez, Johanna E Citalán;

**INDIA:** Deenanath Mangeshkar Hospital And Research Center (Pune): Sameer A Jog, Safal D Sable; Care Institute Of Medical Sciences (CIMS) Hospital (Ahmedabad): Bhagyesh Shah ; Sanjay Gandhi Postgraduate Institute Of Medical Sciences (SGPGIMS) (Lucknow): Mohan Gurjar, Arvind K Baronia; Rajasthan Hospital (Ahmedabad): Mohammedfaruk Memon ; National Institute Of Mental Health And Neuro Sciences (NIMHANS) (Bangalore): Radhakrishnan Muthuchellappan, Venkatapura J Ramesh; Anaesthesiology Unit of the Kasturba Medical College & Dept of Respiratory Therapy, SHOAS, Manipal University (Manipal): Anitha Shenoy, Ramesh Unnikrishnan; Sanjeevan Hospital (Pune): Subhal B Dixit, Rachana V Rhayakar; Apollo Hospitals (Chennai): Nagarajan Ramakrishnan , Vallish K Bhardwaj; Medicine Unit of the Kasturba Medical College & Dept of Respiratory Therapy, SHOAS, Manipal University (Manipal): Heera L Mahto, Sudha V Sagar; G Kuppuswamy Naidu Memorial Hospital (Coimbatore): Vijayanand Palaniswamy, Deeban Ganesan;

**IRAN:** NRITLD/Masih Daneshvari (Tehran): Seyed Mohammadreza Hashemian, Hamidreza Jamaati ; Milad Hospital (Tehran): Farshad Heidari

**IRELAND:** St Vincent's University Hospital (Dublin): Edel A Meaney, Alistair Nichol; Mercy University Hospital (Cork): Karl M Knapman, Donall O'Croinin ; Cork University Hospital (Cork): Eimhin S Dunne, Dorothy M Breen; Galway University Hospital (Galway): Kevin P Clarkson, Rola F Jaafar; Beaumont Hospital (Dublin): Rory Dwyer, Fahd Amir; Mater Misericordiae University Hospital (Dublin): Olaitan O Ajetunmobi, Aogan C O'Muircheartaigh; Tallaght Hospital (Dublin): Colin S Black, Nuala Treanor; Saint James's Hospital (Dublin): Daniel V Collins, Wahid Altaf;

**ITALY:** Santa Maria delle Croci Hospital (Ravenna): Gianluca Zani, Maurizio Fusari; Arcispedale Sant'Anna Ferrara. (Ferrara): Savino Spadaro, Carlo A Volta; Ospedale Profili (Fabriano) (An): Romano Graziani, Barbara Brunettini; Umberto I Nocera Inferiore (Nocera Inferiore Salerno): Salvatore Palmese; Azienda Ospedaliera San

Paolo – Polo Universitario- Università degli Studi di Milano (Milan): Paolo Formenti, Michele Umbrello; Sant'Anna (San Fermo Della Battaglia (Co)): Andrea Lombardo; Spedali Civili Brescia (Brescia): Elisabetta Pecci, Marco Botteri; Fondazione Irccs Ca Granda, Ospedale Maggiore Policlinico (Milan): Monica Savioli, Alessandro Protti; University Campus Bio-Medico of Rome (Rome): Alessia Mattei, Lorenzo Schiavoni; Azienda Ospedaliera "Mellino Mellini" (Chiari (Bs)): Andrea Tinnirello, Manuel Todeschini; Policlinico P. Giaccone, University of Palermo (Palermo): Antonino Giarratano, Andrea Cortegiani; Niguarda Cà Granda Hospital (Milan): Sara Sher, Anna Rossi; A.Gemelli University Hospital (Rome): Massimo M Antonelli, Luca M Montini; Ospedale "Sandro Pertini" (Rome): Paolo Casalena, Sergio Scafetti; ISMeTT IRCCS UPMC (Palermo): Giovanna Panarello, Giovanna Occhipinti; Ospedale San Gerardo (Monza): Nicolò Patroniti, Matteo Pozzi; Santa Maria Della Scaletta (Imola): Roberto R Biscione, Michela M Poli; Humanitas Research Hospital (Rozzano): Ferdinando Raimondi, Daniela Albiero; Ospedale Desio - Ao Desio-Vimercate (Desio): Giulia Crapelli, Eduardo Beck; Pinetragrande Private Hospital (Castelvoturno): Vincenzo Pota, Vincenzo Schiavone; Irccs San Martino Ist (Genova): Alexandre Molin, Fabio Tarantino; Ospedale San Raffaele (Milano): Giacomo Monti, Elena Frati; Ospedali Riuniti Di Foggia (Foggia): Lucia Mirabella, Gilda Cinnella; Azienda Ospedaliera Luigi Sacco - Polo Universitario (Milano): Tommaso Fossali, Riccardo Colombo; A.O.U. Città della Salute e della Scienza di Torino (Turin): Pierpaolo Terragni Ilaria Pattarino; Università degli Studi di Pavia-Fondazione IRCCS Policlinico San Matteo (Pavia): Francesco Mojoli, Antonio Braschi; Ao Ospedale Civile Legnano (Legnano): Erika E Borotto; Arnas Ospedale Civico Di Cristina Benfratelli (Palermo): Andrea N Cracchiolo, Daniela M Palma; Azienda Ospedaliera Della Provincia Di Lecco - Ospedale "A. Manzoni" (Lecco): Francesco Raponi, Giuseppe Foti; A.O. Provincia Di Lecco - Ospedale Alessandro Manzoni (Lecco): Ettore R Vascotto, Andrea Coppadoro; Cliniche Universitarie Sassari (Sassari): Luca Brazzi, Leda Floris; IRCCS Policlinico San Matteo (Pavia): Giorgio A Iotti, Aaron Venti;

**JAPAN:** Yokohama City University Hospital (Yokohama): Osamu Yamaguchi, Shunsuke Takagi; Toyooka Hospital (Toyooka City, Hyogo Prefecture): Hiroki N Maeyama; Chiba University Hospital (Chiba City): Eizo Watanabe, Yoshihiro Yamaji; Okayama University Hospital (Okayama): Kazuyoshi Shimizu, Kyoko Shiozaki; Japanese Foundation for Cancer Research, Cancer Institute Hospital, Department Of Emergency Medicine And Critical Care (Tokyo): Satoru Futami; Ibaraki Prefectural Central Hospital (Kasama): Sekine Ryosuke; Tohoku University Hospital (Sendai-Shi): Koji Saito, Yoshinobu Kameyama; Tokyo Medical University Hachioji Medical Center (Hachioji, Tokyo): Keiko Ueno; Tokushima University Hospital (Tokushima): Masayo . Izawa, Nao Okuda; Maebashi Red Cross Hospital (Gunma Maebashi): Hiroyuki Suzuki, Tomofumi Harasawa; Urasoe General Hospital (Urasoe): Michitaka Nasu, Tadaaki Takada; Ohta General Hospital Foundation Ohta Nishinouchi Hospital (Fukushima): Fumihito Ito; Jichi Medical University Hospital (Shimotsuke): Shin - Nunomiya, Kansuke - Koyama; Mito Kyodo General Hospital, Tsukuba University Hospital Mito Medical Center (Mito): Toshikazu Abe; Sendai City Hospital (Sendai): Kohkichi Andoh, Kohei Kusumoto; Ja Hiroshima General Hospital (Hatsukaichi City, Hiroshima): Akira Hirata, Akihiro Takaba; Yokohama Rosai Hospital (Yokohama): Hiroyasu Kimura; Nagasaki University Hospital (Nagasaki): Shuhei Matsumoto, Ushio Higashijima; Niigata University Medical & Dental Hospital (Niigata): Hiroyuki Honda, Nobumasa Aoki; Mie University Hospital (Tsu, Mie): Hiroshi Imai; Yamaguchi University Hospital (Ube, Yamaguchi): Yasuaki Ogino, Ichiko Mizuguchi; Saiseikai Kumamoto Hospital (Kumamoto City): Kazuya Ichikado; Shinshu University School Of Medecine (Matsumoto City): Kenichi Nitta, Katsunori Mochizuki; Kuki General Hospital (Kuki): Tomoaki Hashida; Kyoto Medical Center (Kyoto): Hiroyuki Tanaka ; Fujita Health University (Toyoake): Tomoyuki Nakamura, Daisuke Niimi; Rakwakai Marutamachi Hospital (Kyoto): Takeshi Ueda; Osaka University Hospital (Suita City, Osaka Prefecture): Yozo Kashiwa, Akinori Uchiyama;

**LATVIA:** Paul Stradins Clinical University Hospital (Riga): Olegs Sabelnikovs , Peteris Oss ;

**LEBANON:** Kortbawi Hospital (Jounieh): Youssef Haddad ;

**MALAYSIA:** Hospital Kapit (Kapit): Kong Y Liew;

**MEXICO:** Instituto Nacional De Cancerología, México (Mexico City): Silvio A Ñamendys-Silva, Yves D Jarquin-Badiola; Hospital De Especialidades "Antonio Fraga Mouret" Centro Medico Nacional La Raza IMSS (Mexico City): Luis A Sanchez-Hurtado, Saira S Gomez-Flores; Hospital Regional 1° De Octubre (Mexico City): Maria C Marin, Asiselo J Villagomez; Hospital General Dr Manuel Gea Gonzalez (Mexico City): Jordana S Lemus, Jonathan M Fierro; Hospital General De Zona No. 1 Instituto Mexicano Del Seguro Social Tepic Nayarit (Tepic): Mavy Ramirez Cervantes, Francisco Javier Flores Mejia; Centro Medico Dalinde (Mexico D.F.): Dulce Dector, Dulce M Dector; Opd Hospital Civil De Guadalajara Hospital Juan I Menchaca (Guadalajara): Daniel R Gonzalez, Claudia R Estrella; Hospital Regional De Ciudad Madero Pemex (Ciudad Madero): Jorge R Sanchez-Medina, Alvaro Ramirez-Gutierrez; Centro Médico ABC (Mexico D.F.): Fernando G George, Janet S Aguirre; Hospital Juarez De Mexico (Mexico City): Juan A Buensuseso, Manuel Poblano;

**MOROCCO:** Mohammed V University, University Teaching Ibn Sina Hospital (Rabat): Tarek Dendane, Amine Ali Zeggwagh; Hopital Militaire D’Instruction Mohammed V (Rabat): Hicham Balkhi; Errazi (Marrakech): Mina Elkhayari, Nacer Samkaoui; University Teaching Hospital Ibn Rushd (Casablanca): Hanane Ezzouine, Abdellatif Benslama; Hôpital des Spécialités de Rabat (HSR) (Rabat): Mourad Amor, Wajdi Maazouzi;

**NETHERLANDS:** Tjongerschans (Heerenveen): Nedim Cemic, Oliver Beck; Cwz (Nijmegen): Monique M Bruns, Jeroen A Schouten; Rijnstate Hospital (Arnhem): Myra - Rinia, Monique Raaijmakers; Radboud Umc (Nijmegen): Leo M Heunks, Hellen M Van Wezel; Maastricht University Medical Centre (Maastricht): Serge J Heines, Ulrich Strauch; Catharinaziekenhuis (Eindhoven): Marc P Buise; Academic Medical Center (Amsterdam): Fabienne D Simonis, Marcus J Schultz;

**NEW ZEALAND:** Tauranga Hospital (Tauranga): Jennifer C Goodson, Troy S Browne; Wellington Hospital (Wellington): Leanlove Navarra, Anna Hunt; Dunedin Hospital (Dunedin): Robyn A Hutchison, Mathew B Bailey; Auckland City Hospital (Auckland): Lynette Newby, Colin Mearthur; Whangarei Base Hospital (Whangarei): Michael Kalkoff, Alex Mcleod; North Shore Hospital (Auckland): Jonathan Casement, Danielle J Hacking;

**NORWAY:** Ålesund Hospital (Ålesund): Finn H Andersen, Merete S Dolva; Oslo University Hospital - Rikshospitalet Medical Centre (Oslo): Jon H Laake, Andreas Barratt-Due; Stavanger University Hospital (Stavanger): Kim Andre L Noremark, Eldar Søreide; Haukeland University Hospital (Bergen): Brit Å Sjøbø, Anne B Guttormsen;

**PERU:** Hospital Nacional Edgardo Rebagliati Martins (Lima): Hector H Leon Yoshido; Clínica Ricardo Palma (Lima): Ronald Zumaran Aguilar, Fredy A Montes Oscanoa;

**PHILIPPINES:** The Medical City (Pasig): Alain U Alisasis, Joanne B Robles; Chong Hua Hospital (Cebu): Rossini Abbie B Pasanting-Lim, Beatriz C Tan;

**POLAND:** Warsaw University Hospital (Warsaw): Pawel Andruszkiewicz, Karina Jakubowska;

**PORTUGAL:** Centro Hospitalar Da Cova Da Beira (Covilhã): Cristina M Coxo; Hospital Santa Maria, Chln (Lisboa): António M Alvarez, Bruno S Oliveira; Centro Hospitalar Trás-Os-Montes E Alto Douro - Hospital De S.Pedro -Vila Real (Vila Real): Gustavo M Montanha, Nelson C Barros; Hospital Beatriz Ângelo (Loures): Carlos S Pereira, António M Messias; Hospital De Santa Maria (Lisboa): Jorge M Monteiro; Centro Hospitalar Médio Tejo - Hospital De Abrantes (Abrantes): Ana M Araujo, Nuno T Catorze; Instituto Português De Oncologia De Lisboa (Lisboa): Susan M Marum, Maria J Bouw; Hospital Garcia De Orta (Almada): Rui M Gomes, Vania A Brito; Centro Hospitalar Do Algarve (Faro): Silvia Castro, Joana M Estilita; Hpp Hospital De Cascais (Alcabideche): Filipa M Barros; Hospital Prof. Doutor Fernando Fonseca Epe (Amadora): Isabel M Serra, Aurelia M Martinho;

**ROMANIA:** Fundeni Clinical Institute (Bucharest): Dana R Tomescu, Alexandra Marcu; Emergency Clinical County Hospital Timisoara (Timisoara): Ovidiu H Bedreag, Marius Papurica; Elias University Emergency Hospital (Bucharest): Dan E Corneci, Silviu Ioan Negoita;

**RUSSIAN FEDERATION:** University Hospital (Kemerovo): Evgeny Grigoriev ;Krasnoyarsk Regional Hospital, Krasnoyarsk State Medical University (Krasnoyarsk): Alexey I Gritsan, Andrey A Gazenkampf;

**SAUDI ARABIA:** GICU of PSMC (Riyadh): *Ghaleb Almekhlafi, Mohamad M Albarrak*; SICU of PSMC (Riyadh): Ghanem M Mustafa;; King Faisal Hospital And Research Center (Riyadh): Khalid A Maghrabi, Nawal Salahuddin; King Fahad Hospital (Baha): Tharwat M Aisa; King Abdulaziz Medical City (Riyadh): Ahmed S Al Jabbary, Edgardo Tabhan; King Abdulaziz Medical City (Riyadh): Yaseen M Arabi; King Abdulaziz Medical City (Riyadh): Yaseen M Arabi, Olivia A Trinidad; King Abdulaziz Medical City (Riyadh): Hasan M Al Dorzi, Edgardo E Tabhan;

**SOUTH AFRICA:** Charlotte Maxeke Johannesburg Academic Hospital (Johannesburg): Stefan Bolon, Oliver Smith;

**SPAIN:** Hospital Sant Pau (Barcelona): Jordi Mancebo, Hernan Aguirre-Bermeo; Hospital Universitari Bellvitge (L Hospitalet De Llobregat (Barcelona)): Juan C Lopez-Delgado, Francisco Esteve; Hospital Son Llatzer (Palma De Mallorca): Gemma Rialp, Catalina Forteza; Sabadell Hospital, CIBER Enfermedades Respiratorias (Sabadell): Candelaria De Haro, Antonio Artigas; Hospital Universitario Central De Asturias (Oviedo): Guillermo M Albaiceta, Sara De Cima-Iglesias; Complejo Hospitalario Universitario A Coruña (A Coruña): Leticia Seoane-Quiroga, Alexandra Ceniceros-Barros; Hospital Universitario Miguel Servet (Zaragoza): Antonio L Ruiz-Aguilar, Luis M Claraco-Vega; Morales Meseguer University Hospital (Murcia): Juan Alfonso Soler, Maria del Carmen Lorente; Hospital Universitario del Henares (Coslada): Cecilia Hermosa, Federico Gordo; Complejo Asistencial De Palencia. Hospital Rio Carrión (Palencia): Miryam - Prieto-González, Juan B López-Messa; Fundación Jiménez Díaz (Madrid): Manuel P Perez, Cesar P Perez; Hospital Clínico Universitario Lozano Blesa (Zaragoza): Raquel Montoiro Allue; Hospital Verge de la Cinta (Tortosa): Ferran Roche-Campo, Marcos Ibañez-Santacruz; Hospital Universitario 12 De Octubre (Madrid): Susana - Temprano; Hospital Universitario Príncipe De Asturias (Alcalá De Henares, Madrid): Maria C Pintado, Raul De Pablo; Hospital Universitari Germans Trias I Pujol (Badalona): Pilar Ricart Aroa Gómez; Hospital Universitario Arnau De Vilanova De Lleida (Lleida): Silvia Rodriguez Ruiz, Silvia Iglesias Moles; Cst

Terrassa (Barcelona): M<sup>a</sup> Teresa Jurado, Alfons Arizmendi; Hospital Universitari Mútua Terrassa (Terrassa): Enrique A Piacentini; Hospital Universitario De Móstoles (Mostoles): Nieves Franco, Teresa Honrubia; Complejo Asistencial De Salamanca (Salamanca): Meisy Perez Cheng, Elena Perez Losada; Hospital General Universitario De Ciudad Real (Ciudad Real): Javier - Blanco, Luis J Yuste; Torrecardenas (Almeria): Cecilia Carbayo-Gorriz, Francisca G Cazorla-Barranquero; Hospital Universitario Donostia (San Sebastian): Javier G Alonso, Rosa S Alda; Hospital Universitario De Torrejón (Madrid): Ángela Algaba, Gonzalo Navarro; Hospital Universitario De La Princesa (Madrid): Enrique Cereijo, Esther Diaz-Rodriguez; Hospital Universitario Lucus Augusti (Lugo): Diego Pastor Marcos, Laura Alvarez Montero; Hospital Universitario Santa Lucia (Cartagena): Luis Herrera Para, Roberto Jimenez Sanchez; Hospital Universitario Severo Ochoa, Leganes (Madrid): Miguel Angel Blasco Navalpotro, Ricardo Diaz Abad; University Hospital Of Ntra. Sra. De Candelaria (Santa Cruz De Tenerife): Raquel Montiel Gonz á lez, D á cil Parrilla Toribio; Hospital Universitario Marques De Valdecilla (Santander): Alejandro G Castro, Maria Jose D Artiga; Hospital Infanta Cristina (Parla, Madrid): Oscar Penuelas ; Hospital General De Catalunya (Sant Cugat Del Valles): Tomas P Roser, Moreno F Olga; San Pedro De Alcántara (Cáceres): Elena Gallego Curto, Rocío Manzano Sánchez; Sant Joan De Reus (Reus): Vallverdu P Imma, Garcia M Elisabet; Hospital Joan XXIII (Tarragona): Laura Claverias, Monica Magret; Hospital Universitario De Getafe (Madrid): Ana M Pellicer, Lucia L Rodriguez; Hospital Universitario Río Hortega (Valladolid): Jesús Sánchez-Ballesteros, Ángela González-Salamanca; Hospital Arquitecto Marcide (Ferrol,La Coruña): Antonio G Jimenez, Francisco P Huerta; Hospital General Universitario Gregorio Marañón (Madrid): Juan Carlos J Sotillo Diaz, Esther Bermejo Lopez; Hospital General De Segovia (Segovia): David D Linares Moya, Alec A Tallet Alfonso; Hospital General Universitario Reina Sofia (Murcia): Palazon Sanchez Eugenio Luis, Palazon Sanchez Cesar; Complejo Hospitalario Universitario De Albacete (Albacete): Sánchez I Rafael, Corcoles G Virgilio; Hospital Infanta Elena (Valdemoro): Noelia N Recio;

**SWEDEN:** Sahlgrenska University Hospital (Gothenburg): Richard O Adamsson, Christian C Rylander; Karolinska University Hospital (Stockholm): Bernhard Holzgraefe, Lars M Broman; Akademiska Sjukhuset Uppsala (Uppsala): Joanna Wessbergh, Linnea Persson; Vrinnevisjukhuset (Norrköping): Fredrik Schiöler, Hans Kedelv; Linköping University Hospital (Linköping): Anna Oscarsson Tibblin, Henrik Appelberg; Skellefteå Lasarett (Skellefteå): Lars Hedlund, Johan Helleberg; Karolinska University Hospital Solna (Stockholm): Karin E Eriksson, Rita Glietsch; Umeå University Hospital (Umeå): Niklas Larsson, Ingela Nygren; Danderyd Hospital (Stockholm): Silvia L Nunes, Anna-Karin Morin; Lund University Hospital (Lund): Thomas Kander, Anne Adolfsson;

**SWITZERLAND:** Chuv (Centre Hospitalier Universitaire Vaudois) (Lausanne): Lise Piquilloud; Hôpital neuchâtelois - La Chaux-De-Fonds (La Chaux-De-Fonds): Hervé O. Zender, Corinne Leemann-Refondini;

**TUNISIA:** Hopital Taher Sfar Mahdia (Mahdia): Souheil Elatrous; University Hospital Farhat Hached Sousse (Sousse): Slaheddine Bouchoucha, Imed Chouchene; CHU F.Bourguiba (Monastir): Islem Ouanes; Mongi Slim University Hospital, La Marsa (La Marsa): Asma Ben Souissi, Salma Kamoun;

**TURKEY:** Cerrahpasa Medical Faculty Emergency Intensive Care Unit (Istanbul): Oktay Demirkiran; Cerrahpasa Medical Faculty Sadi Sun Intensive Care Unit (Istanbul) : Mustafa Aker, Emre Erbabacan; Uludag University Medical Faculty (Bursa): Ilkay Ceylan, Nermin Kelebek Girgin; Ankara University Faculty of Medicine, Reanimation 3rd level ICU (Ankara): Menekse Ozcelik, Necmettin Ünal; Ankara University Faculty of Medicine, 2nd level ICU-postoperative ICU (Ankara): Basak Ceyda Meco; Istanbul Kartal Egitim Ve Arastirma Hastanesi (Istanbul): Onat O Akyol, Suleyman S Derman;

**UNITED KINGDOM:** Papworth Hospital (Cambridge): Barry Kennedy, Ken Parhar; Royal Glamorgan Hospital (Llantrisant): Latha Srinivasa; Royal Victoria Hospital-Belfast (Belfast): Lia McNamee, Danny McAuley; Jack Steinberg ICU of the King's College (London): Phil Hopkins, Clare Mellis; Frank Stansil ICU of the King's College Hospital (London): Vivek Kakar; ;Liver ICU of the King's College (London): Dan Hadfield; Christine Brown ICU of the King's College (London): Andre Vercueil; West Suffolk Hospital (Bury St Edmunds): Kaushik Bhowmick, Sally K Humphreys; Craigavon Area Hospital (Portadown): Andrew Ferguson, Raymond Mckee; Barts Health NHS Trust, Whipps Cross Hospital (Leytonstone): Ashok S Raj, Danielle A Fawkes; Kettering General Hospital, Foundation NHS Trust (Northamptonshire): Philip Watt, Linda Twohey; Barnet General Hospital (Barnet): Rajeev R JhaMatthew Thomas, Alex Morton, Varsha Kadaba; Rotherham General Hospital (Rotherham): Mark J Smith, Anil P Hormis; City Hospital, (Birmingham): Santhana G Kannan, Miriam Namih; Poole Hospital NHS Foundation Trust (Poole): Henrik Reschreiter, Julie Camsooksai; Weston General Hospital (Weston-Super-Mare): Alek Kumar, Szabolcs Rugonfalvi; Antrim Area Hospital (Antrim): Christopher Nutt, Orla Oneill; Aintree University Hospital (Liverpool): Colette Seasman, Ged Dempsey; Northern General Hospital (Sheffield): Christopher J Scott, Helen E Ellis; John Radcliffe Hospital (Oxford): Stuart Mckechnie, Paula J Hutton; St Georges Hospital (London): Nora N Di Tomasso, Michela N Vitale; Hillingdon Hospital (Uxbridge): Ruth O Griffin, Michael N Dean; The Royal Bournemouth & Christchurch NHS Foundation Trust (Bournemouth, Dorset): Julius H Cranshaw, Emma L Willett; Guys And St Thomas NHS Foundation Trust (London): Nicholas Ioannou, Gsst Severe Respiratory Failure Service ;

Whittington Hospital (London): Sarah Gillis; Wexham Park Hospital (Slough): Peter Csabi; Western General Hospital (Edinburgh): Rosaleen Macfadyen, Heidi Dawson; Royal Preston Hospital (Preston): Pieter D Preez, Alexandra J Williams; Brighton And Sussex University Hospitals NHS Trust (Brighton): Owen Boyd, Laura Ortiz-Ruiz De Gordo; East And North Herts NHS Trust (Stevenage): Jon Bramall, Sophie Symmonds; Barnsley Hospital (Barnsley): Simon K Chau, Tim Wenham; Prince Charles Hospital (Merthyr Tydfil): Tamas Szakmany, Piroska Toth-Tarsoly; University Hospital Of South Manchester NHS Foundation Trust (Manchester): Katie H Mccalman, Peter Alexander; Harrogate District Hospital (Harrogate): Lorraine Stephenson, Thomas Collyer; East And North Herts NHS Trust (Welwyn Garden City): Rhiannon Chapman, Raphael Cooper; Western Infirmary (Glasgow): Russell M Allan, Malcolm Sim; Dumfries And Galloway Royal Infirmary (Dumfries): David W Wrathall, Donald A Irvine; Charing Cross Hospital (London): Kim S Zantua, John C Adams; Worcestershire Royal Hospital (Worcester): Andrew J Burtenshaw, Gareth P Sellors; Royal Liverpool University Hospital (Liverpool): Ingeborg D Welters, Karen E Williams; Royal Alexandra Hospital (Glasgow): Robert J Hessel, Matthew G Oldroyd; Morriston Hospital (Swansea): Ceri E Battle, Suresh Pillai; Frimley Park Hospital (Frimley): Istvan - Kajtor, Mageswaran - Sivashanmugavel; Altnagelvin Hospital (Derry): Sinead C Okane, Adrian Donnelly; Buckinghamshire Healthcare NHS Trust (High Wycombe, Buckinghamshire): Aniko D Frigyik, Jon P Careless; Milton Keynes Hospital (Milton Keynes): Martin M May, Richard Stewart; Ulster Hospital (Belfast): T John Trinder, Samantha J Hagan; University Hospital of Wales (Cardiff): Matt P Wise, Jade M Cole; Freeman Hospital (Newcastle Upon Tyne): Caroline C MacFie, Anna T Dowling;

**URUGUAY:** Hospital Español (Montevideo): Javier Hurtado, Nicolás Nin; Cudam (Montevideo): Javier Hurtado; Sanatorio Mautone (Maldonado): Edgardo Nuñez ; Sanatorio Americano (Montevideo): Gustavo Pittini, Ruben Rodriguez; Hospital De Clínicas (Montevideo): María C Imperio, Cristina Santos; Circulo Católico Obreros Uruguay-Sanatorio JP II (Montevideo): Ana G. França, Alejandro EBEID; CASMU (Montevideo): Alberto Deicas, Carolina Serra

**USA:** Saint Louis University Hospital (St.Louis): Aditya Uppalapati, Ghassan Kamel; Beth Israel Deaconess Medical Center (Boston): Valerie M Banner-Goodspeed, Jeremy R Beitler; Memorial Medical Center (Springfield): Satyanarayana Reddy Mukkera, Shreedhar Kulkarni; Massachusetts General Hospital (Boston): Jarone Lee, Tomaz Mesar; University Of Cincinnati Medical Center (Cincinnati): John O Shinn Iii, Dina - Goomaa; Massachusetts General Hospital (Boston): Christopher Tainter, Jarone Lee; Massachusetts General Hospital (Boston): Tomaz Mesar, Jarone Lee; R Adams Cowley Shock Trauma Center (Baltimore): Dale J Yeatts, Jessica Warren; Intermountain Medical Center (Murray, Utah): Michael J Lanspa, Russel R Miller; Intermountain Medical Center (Murray, Utah): Colin K Grissom, Samuel M Brown; Mayo Clinic (Rochester): Philippe R Bauer; North Shore Medical Center (Salem): Ryan J Gosselin, Barrett T Kitch; Albany Medical Center (Albany): Jason E Cohen, Scott H Beegle; John H Stoger Hospital Of Cook County (Chicago, Il): Renaud M Gueret, Aiman Tulaimat; Albany Medical Center (Albany): Shazia Choudry ; University of Alabama at Birmingham (UAb) (Birmingham, AL): William Stigler, Hitesh Batra ; Duke University Hospital (Durham): Nidhi G Huff; Iowa Methodist Medical Center (Des Moines, Iowa): Keith D Lamb, Trevor W Oetting; Surgical & Neurosciences Intensive Care Unit of the University Of Iowa Hospitals And Clinics (Iowa City, Iowa): Nicholas M Mohr, Claine Judy; Medical Center of Louisiana at New Orleans (New Orleans, Louisiana): Shigeki Saito, Fayez M Kheir; Tulane University (New Orleans): Fayez Kheir; Critical Care Unit of the University Of Iowa Hospitals And Clinics (Iowa City, Iowa): Adam B Schlichting, Angela Delsing; University Of California, San Diego Medical Center (San Diego, Ca): Daniel R Crouch, Mary Elmasri; Uc San Diego Thornton Hospital (La Jolla): Daniel R Crouch, Dina Ismail; University Hospital (Cincinnati): Kyle R Dreyer, Thomas C Blakeman; University Hospital (Cincinnati): Kyle R Dreyer, Dina Goomaa; Tower 3B Medical ICU of Brigham and Women's Hospital (Boston): Rebecca M Baron, Carolina Quintana Grijalba; Tower 8C Burn/Trauma ICU of Brigham and Women's Hospital (Boston): Peter C Hou; Tower 8D Surgical ICU of Brigham and Women's Hospital (Boston): Raghu Seethala; Tower 9C Neurosurgical ICU of Brigham and Women's Hospital (Boston): Imo Aisiku; Tower 9D Neurological ICU of Brigham and Women's Hospital (Boston): Galen Henderson; Tower 11C Thoracic ICU of Brigham and Women's Hospital (Boston): Gyorgy Frenndl; Shapiro 6W Cardiac Surgery ICU of Brigham and Women's Hospital (Boston): Sen-Kuang Hou; Shapiro 9E Coronary Care Unit of Brigham and Women's Hospital (Boston): Robert L Owens, Ashley Schomer;

**SERBIA:** Clinical Center of Serbia (Belgrade): Vesna Bumbasirevic, Bojan Jovanovic; ; Military Medical Academy (Belgrade): Maja Surbatovic, Milic Veljovic;
