# Supplementary material
Source: PubMed Central journal article supplement (PMC8976729)

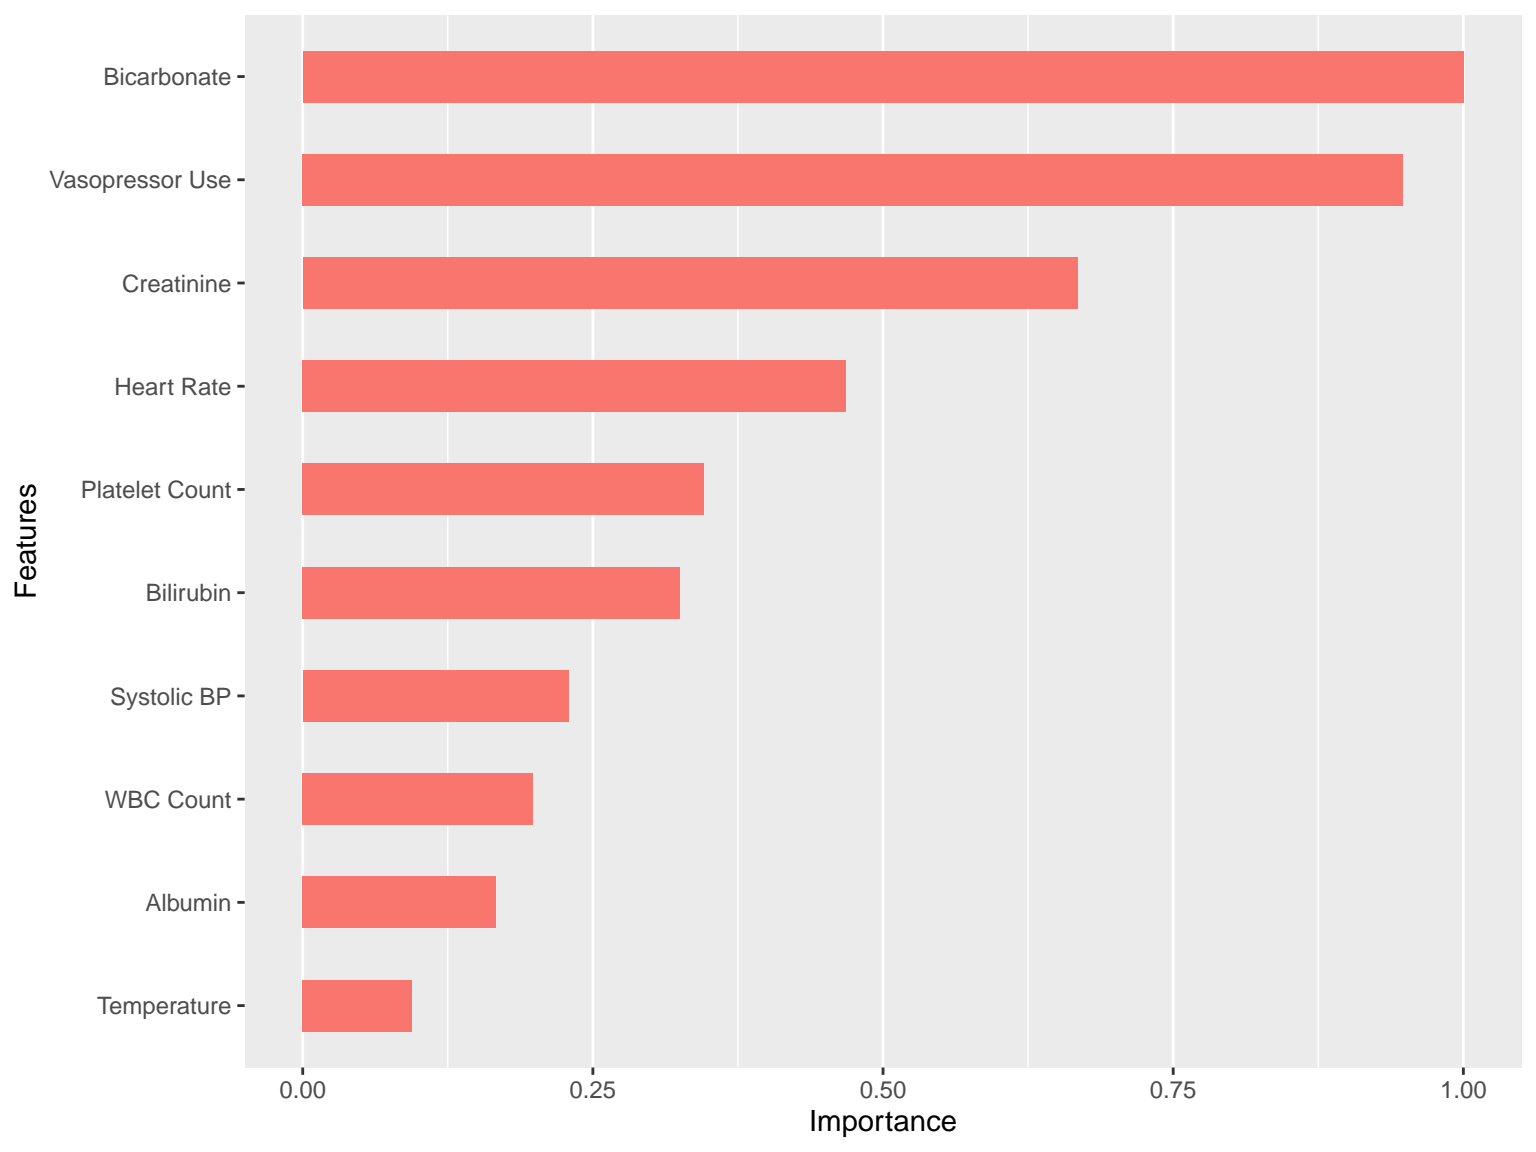

Supplement: NIHMS1772431-supplement-1.pdf [file NIHMS1772431-supplement-1.pdf]

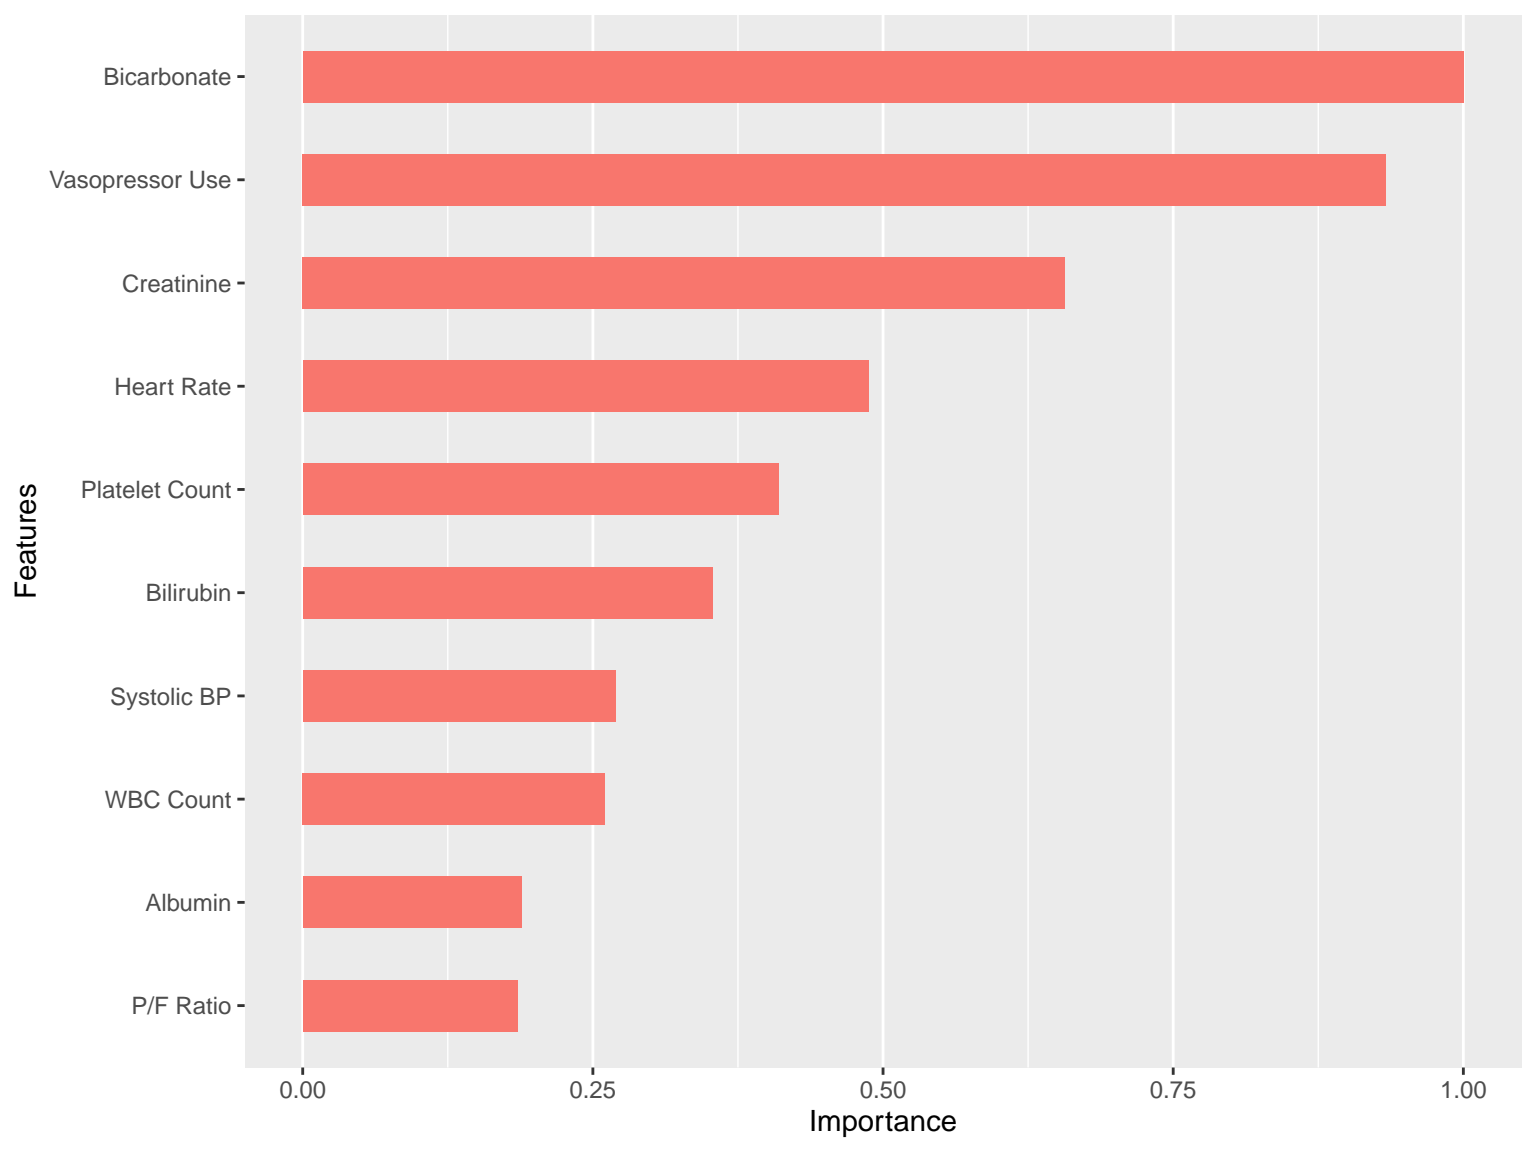

Supplement: NIHMS1772431-supplement-2.pdf [file NIHMS1772431-supplement-2.pdf]

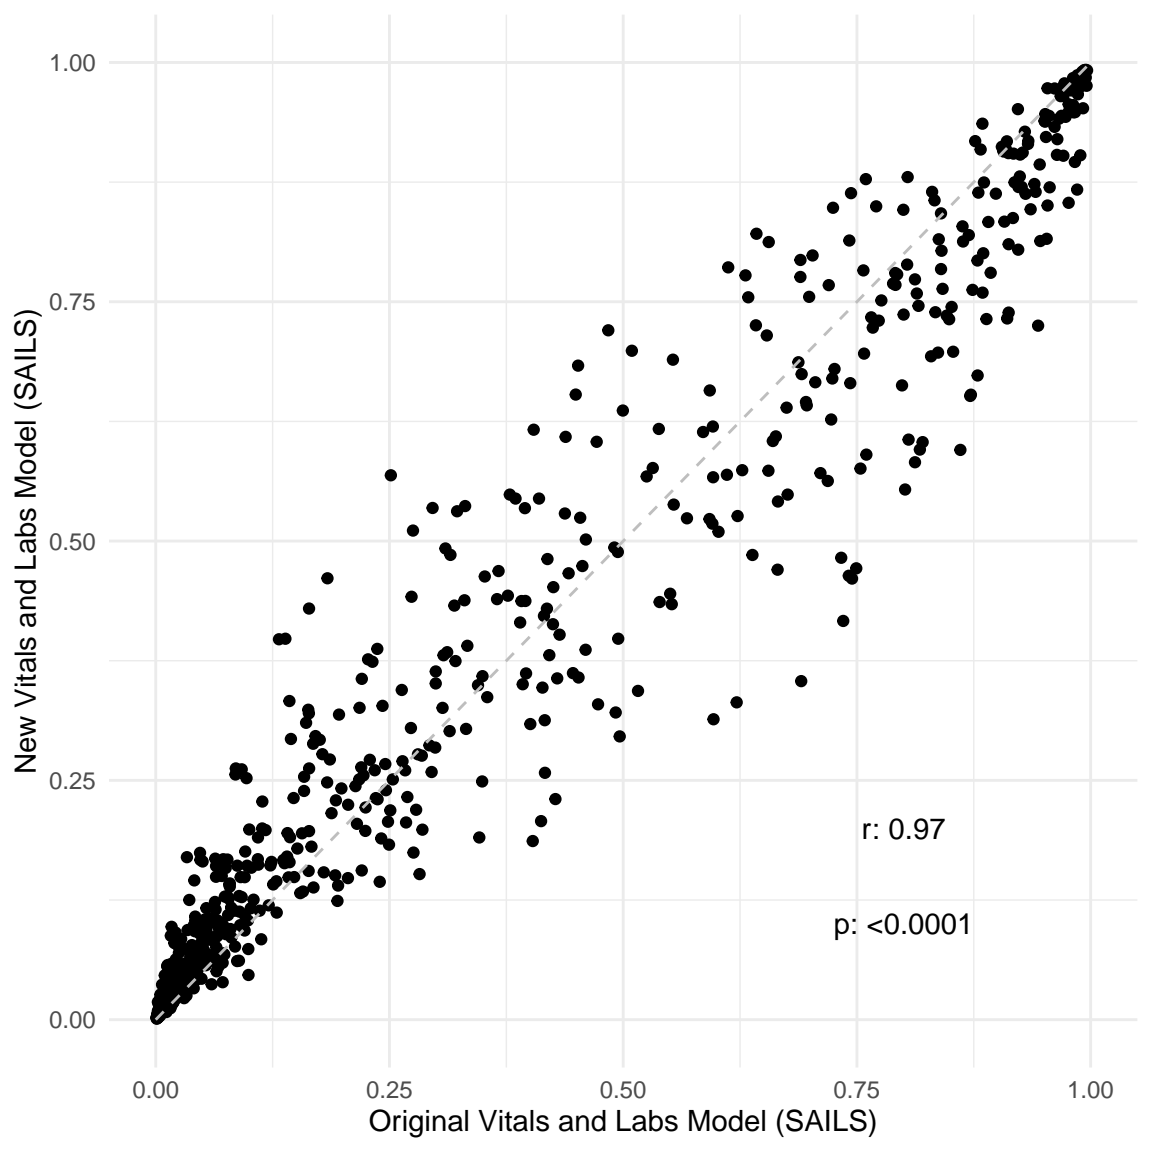

Supplement: NIHMS1772431-supplement-3.pdf [file NIHMS1772431-supplement-3.pdf]

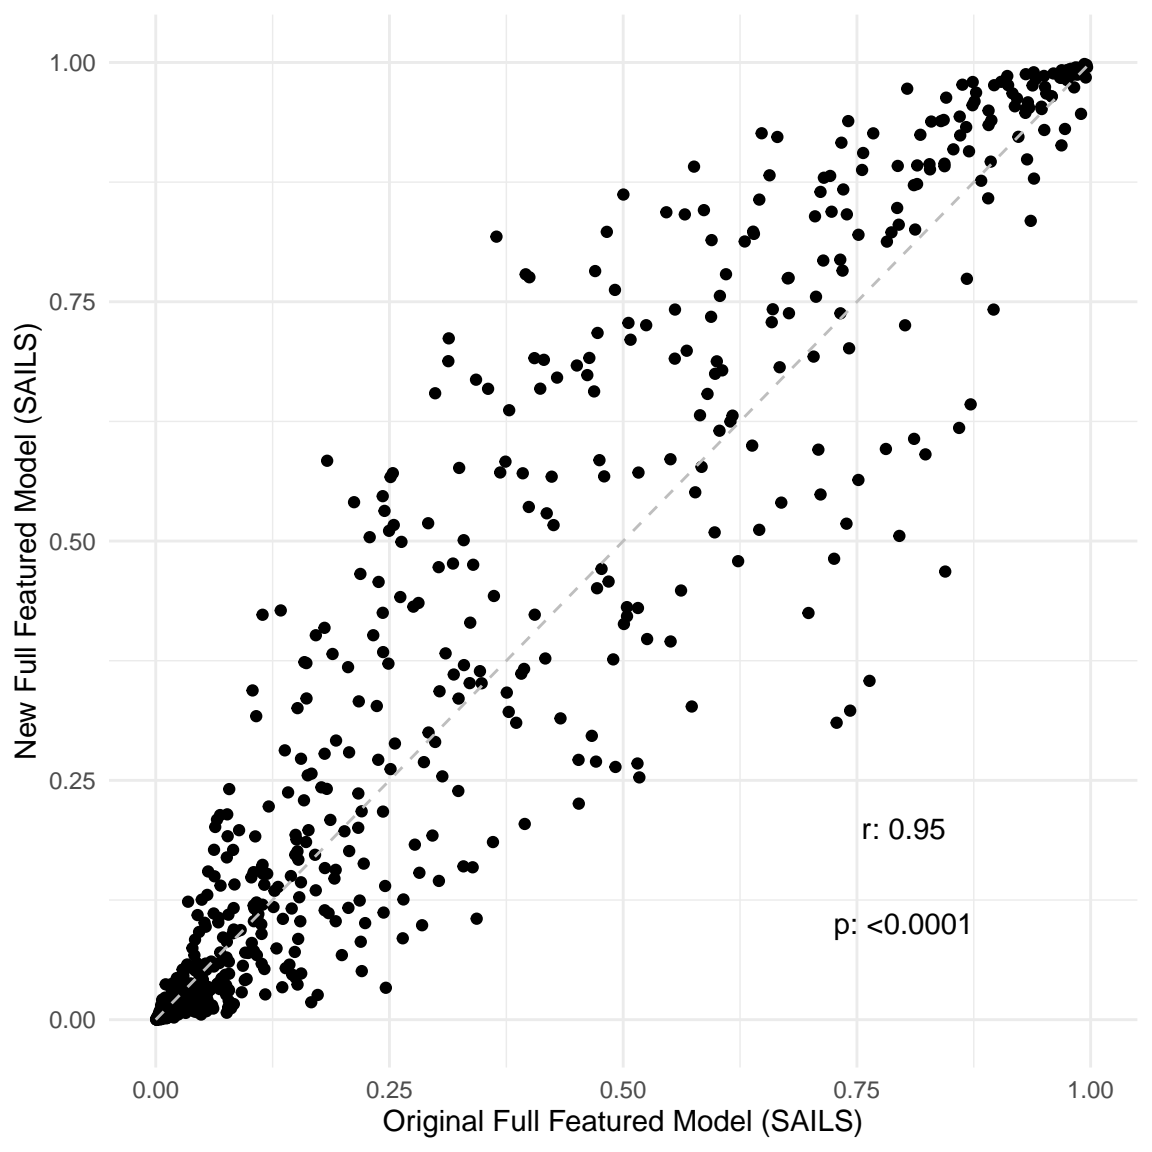

Supplement: NIHMS1772431-supplement-4.pdf [file NIHMS1772431-supplement-4.pdf]

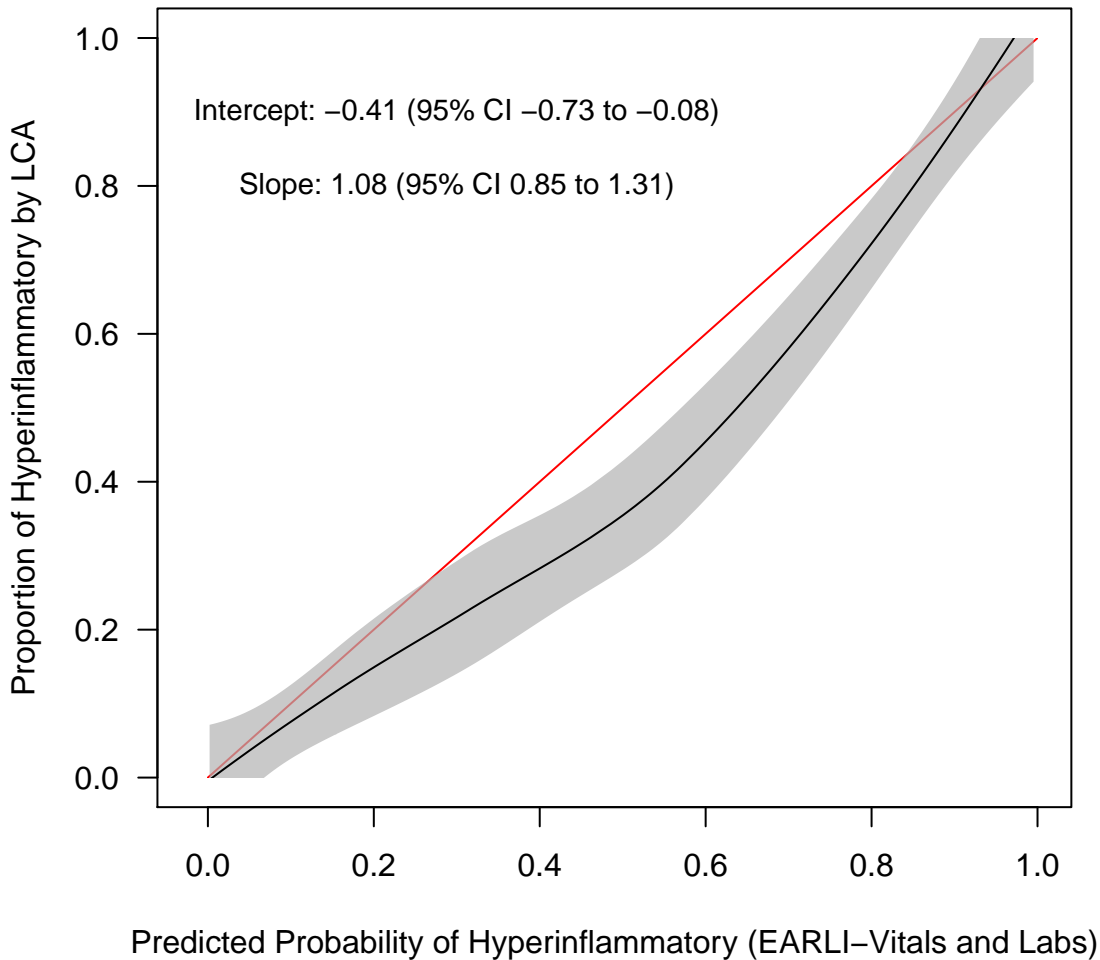

Supplement: NIHMS1772431-supplement-5.pdf [file NIHMS1772431-supplement-5.pdf]

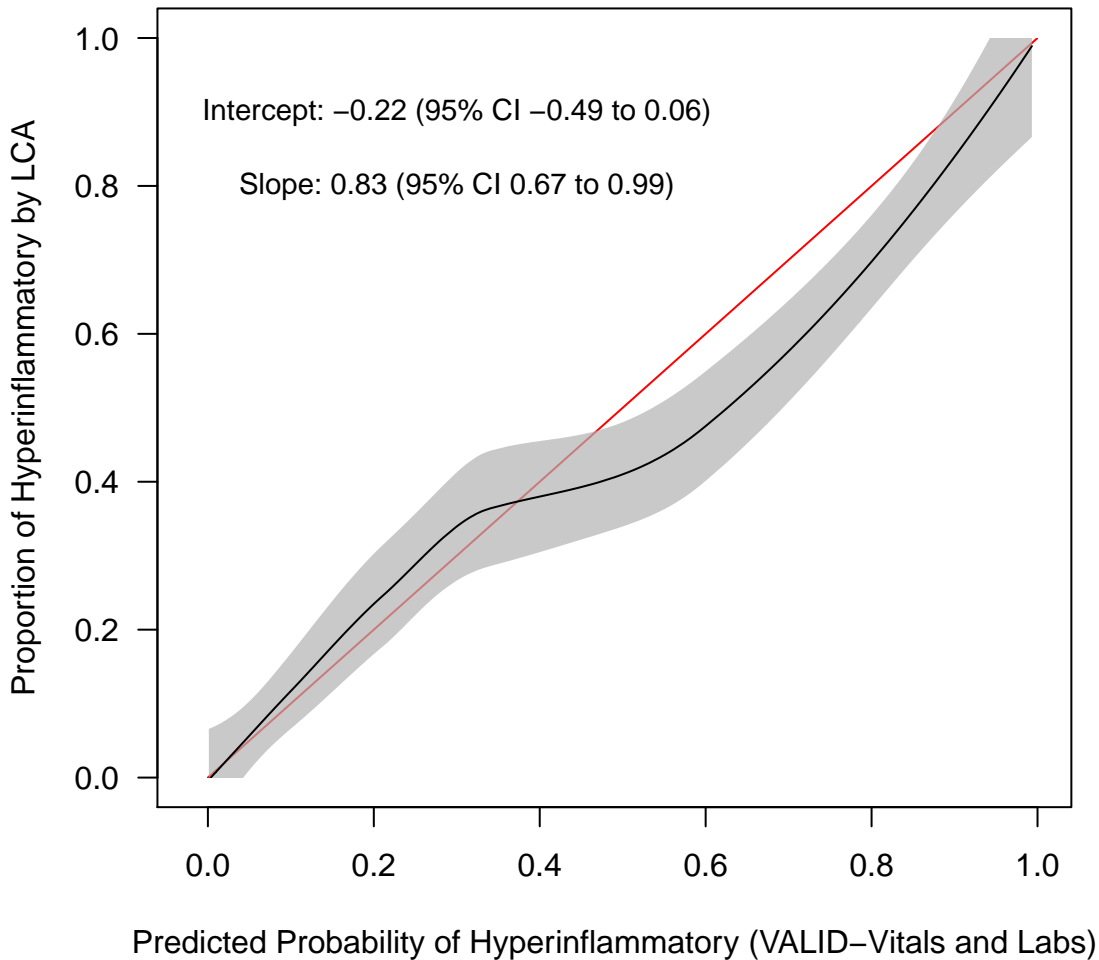

Supplement: NIHMS1772431-supplement-6.pdf [file NIHMS1772431-supplement-6.pdf]

— EARLI — VALID

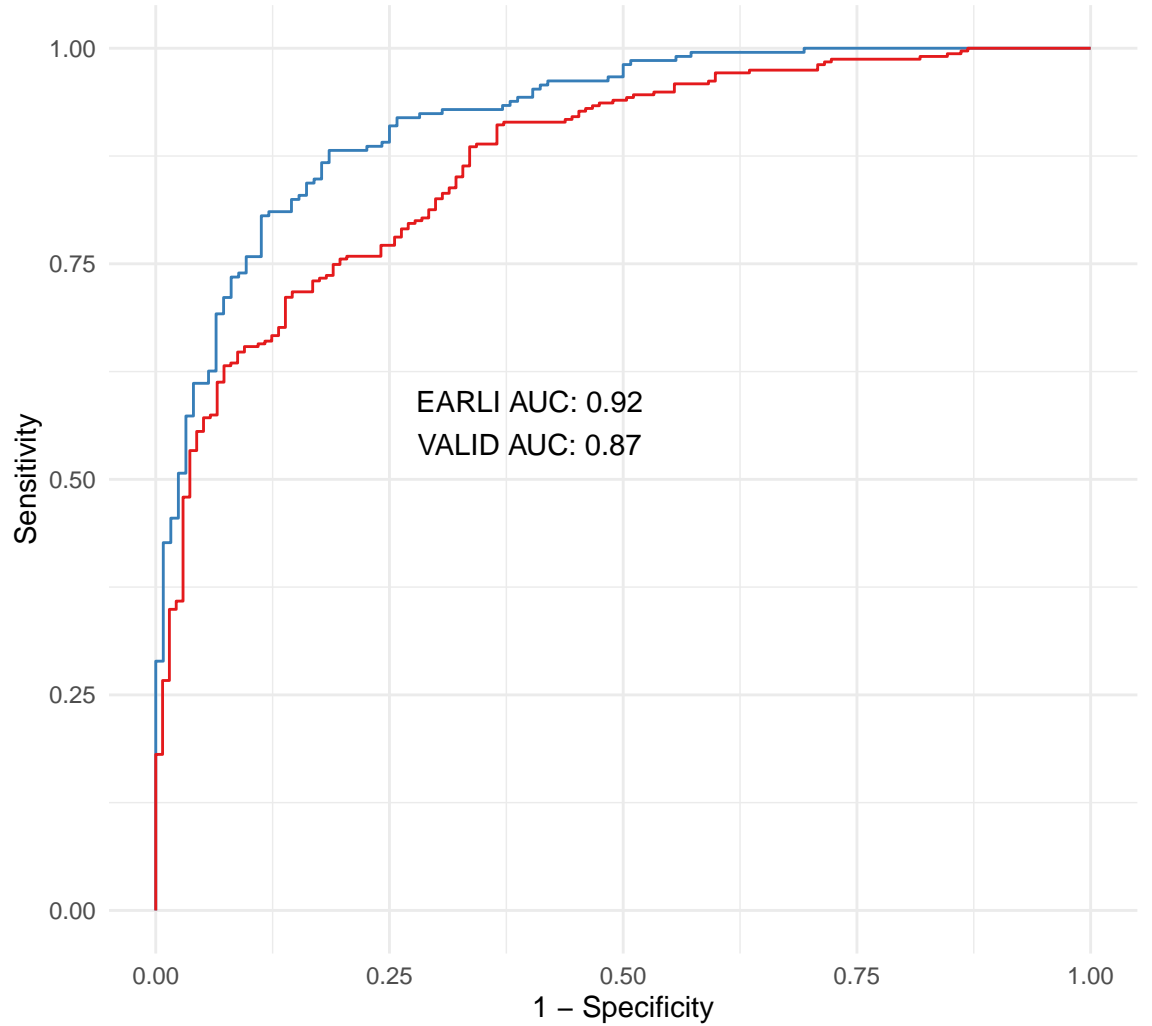

EARLI AUC: 0.92  
VALID AUC: 0.87

Supplement: NIHMS1772431-supplement-7.pdf [file NIHMS1772431-supplement-7.pdf]

## EARLI

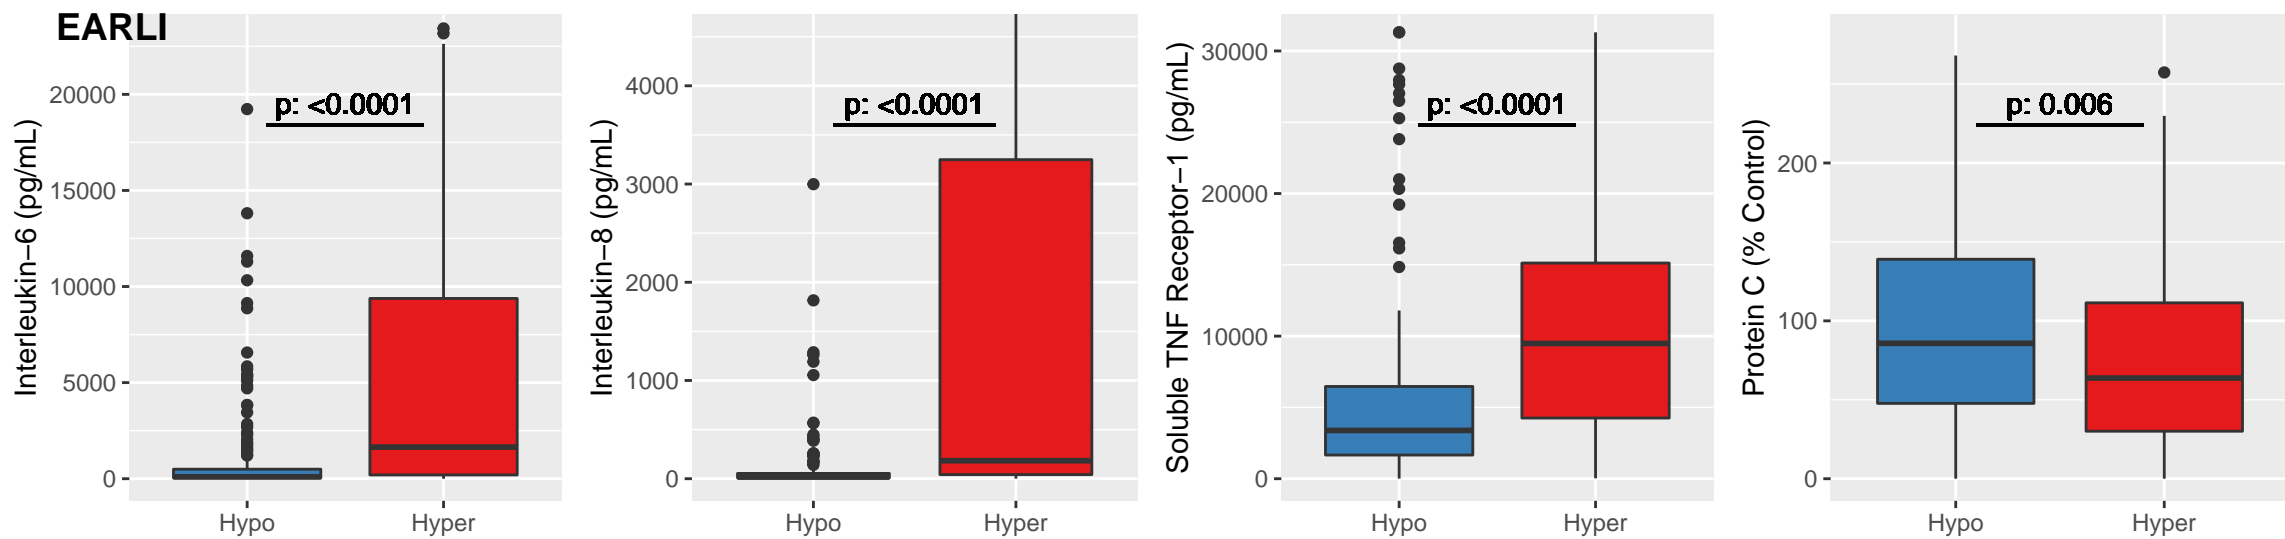

## VALID

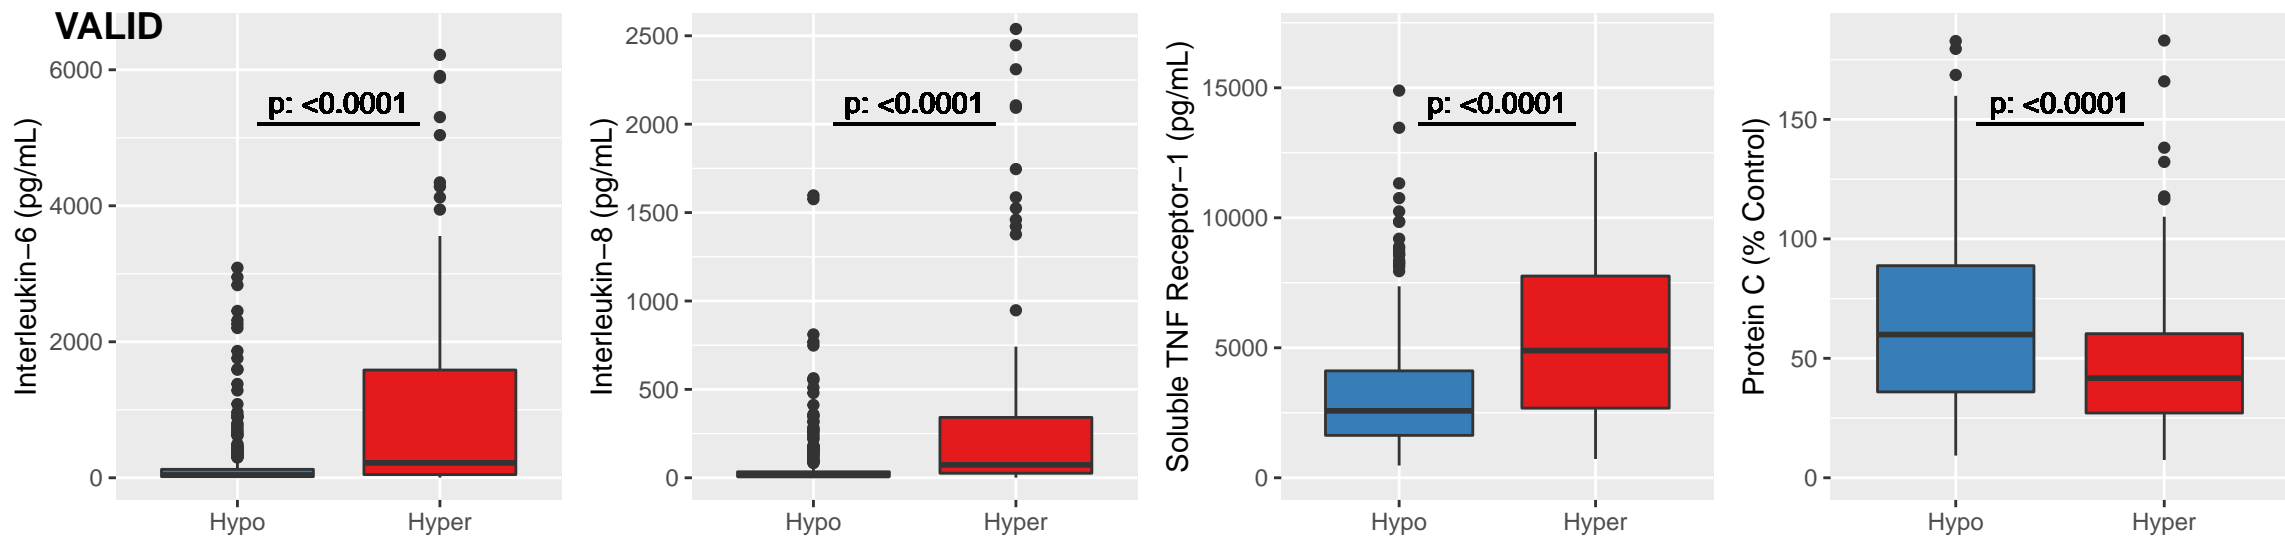

Predicted Phenotype

Supplement: NIHMS1772431-supplement-8.pdf [file NIHMS1772431-supplement-8.pdf]

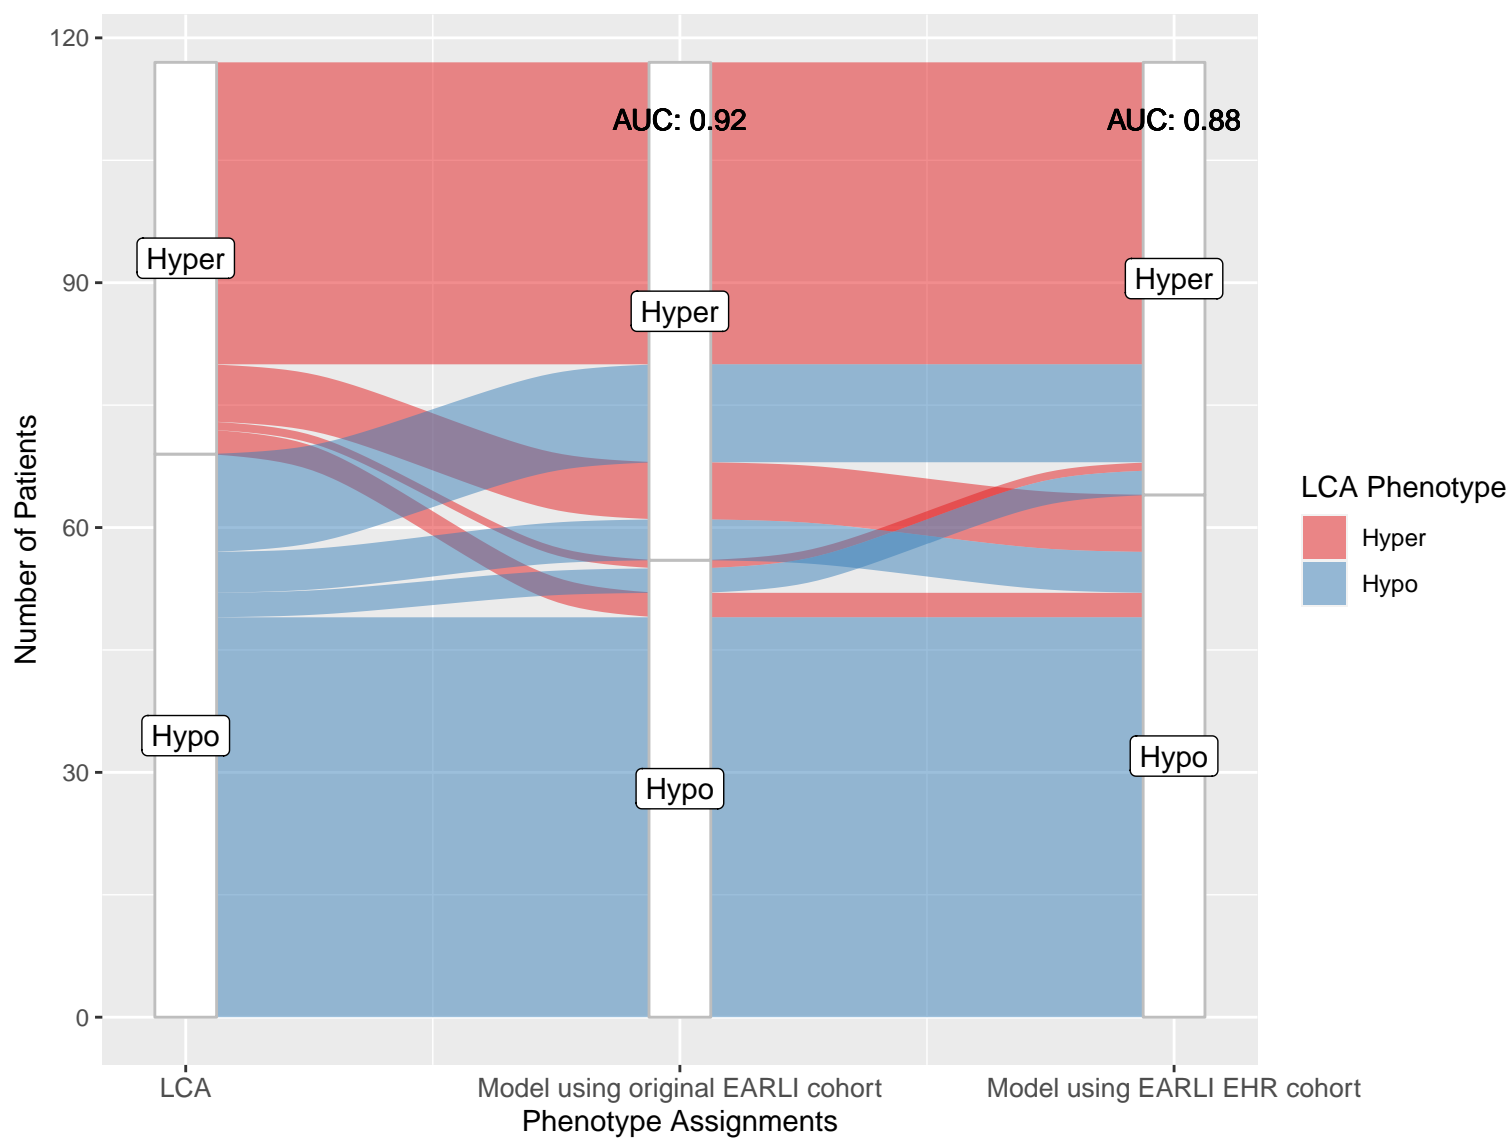

Supplement: NIHMS1772431-supplement-9.pdf [file NIHMS1772431-supplement-9.pdf]
